# Supplementary material for: Virus-derived small RNAs in the penaeid shrimp Fenneropenaeus chinensis during acute infection of the DNA virus WSSV
Source: PubMed Central journal article supplement (PMC4923869; doi:10.1038/srep28678), 2016-06-28
Supplement: srep28678-s1.pdf [file srep28678-s1.pdf]

**Virus-derived small RNAs in the penaeid shrimp *Fenneropenaeus chinensis* during acute infection of the DNA virus WSSV**

Chengzhang Liu<sup>1</sup>, Fuhua Li<sup>1,2</sup>, Yumiao Sun<sup>1</sup>, Xiaojun Zhang<sup>1,2</sup>,

Jianbo Yuan<sup>1</sup>, Hui Yang<sup>1</sup>, Jianhai Xiang<sup>1,2,\*</sup>

<sup>1</sup>Key Laboratory of Experimental Marine Biology, Institute of Oceanology,

Chinese Academy of Sciences, Qingdao 266071, China

<sup>2</sup>Laboratory for Marine Biology and Biotechnology, Qingdao National Laboratory

for Marine Science and Technology, Qingdao 266071, China

\*Address correspondence to Jianhai Xiang, [jhxiang@qdio.ac.cn](mailto:jhxiang@qdio.ac.cn)

**Table S1** WSSV genes potentially regulated by WSSV miRNAs

| <b>Target genes</b>     | <b>WSSV miRNAs</b> | <b>Samples<sup>a</sup></b> |
|-------------------------|--------------------|----------------------------|
| <i>ORF126</i>           | N1,m1              | CEP+INT                    |
| <i>ORF14</i>            | m11                | CEP+INT                    |
| <i>ORF61</i>            | N1,m1,m7           | CEP+INT                    |
| putative DNA polymerase | m2,m6              | CEP+INT                    |
| <i>WSSV156</i>          | m11                | CEP                        |
| <i>WSSV507</i>          | m6                 | CEP+INT                    |
| <i>wsv026</i>           | m1,m2              | CEP+INT                    |
| <i>wsv067</i>           | m6                 | CEP                        |
| <i>wsv133</i>           | m1,m6              | CEP+INT                    |
| <i>wsv139</i>           | m12,m2             | CEP+INT                    |
| <i>wsv151</i>           | N1,m1,m2,m6,m9,m10 | CEP+INT                    |
| <i>wsv184</i>           | N1,m7              | CEP+INT                    |
| <i>wsv206</i>           | m1                 | CEP+INT                    |
| <i>wsv269</i>           | miR-211            | CEP                        |
| <i>wsv277</i>           | m1,m11             | CEP+INT                    |
| <i>wsv282</i>           | m1,m6              | CEP+INT                    |
| <i>wsv303</i>           | m7,m9              | CEP+INT                    |
| <i>wsv340</i>           | N1,m6              | CEP+INT                    |
| <i>wsv387</i>           | m7                 | CEP+INT                    |
| <i>wsv395</i>           | m1,m12,miR-211     | CEP+INT                    |
| <i>wsv415</i>           | m1,m7,m12          | CEP+INT                    |
| <i>wsv442</i>           | m1                 | CEP                        |

<sup>a</sup>**CEP:** cephalothoraxes; **INT:** intestine

**Table S2 Virus-derived sRNA profiles of animal viruses**

| <b>Virus</b> | <b>Genome</b> | <b>Host</b>     | <b>Genome covered<sup>a</sup></b> | <b>Length (nt)</b> | <b>Strand polarity<sup>b</sup></b> | <b>5' bias<sup>c</sup></b> | <b>Class</b> | <b>Reference<sup>d</sup></b>                                 |
|--------------|---------------|-----------------|-----------------------------------|--------------------|------------------------------------|----------------------------|--------------|--------------------------------------------------------------|
| ANV          | +ssRNA        | fruit fly       | /                                 | 27~28              | +                                  | /                          | piRNA        | (Wu et al., 2010)                                            |
| DBV          | dsRNA         | fruit fly       | /                                 | ~21                | +                                  | U                          | siRNA        | (Wu et al., 2010)                                            |
| DCV          | +ssRNA        | fruit fly       | /                                 | ~21                | +                                  | /                          | siRNA        | (Wu et al., 2010)                                            |
| DCV          | +ssRNA        | fruit fly       | /                                 | 27~28              | +                                  | /                          | piRNA        | (Wu et al., 2010)                                            |
| DCV          | +ssRNA        | fruit fly       | /                                 | ~21                | +87.4%                             | /                          | siRNA        | (Sabin et al., 2013)                                         |
| DENV2        | +ssRNA        | mosquito        | /                                 | 20~23              | +/-                                | /                          | siRNA        | (Scott et al., 2010)                                         |
| DENV2        | +ssRNA        | mosquito        | /                                 | 24~30              | +                                  | /                          | piRNA        | (Scott et al., 2010)                                         |
| rDENV-4      | +ssRNA        | mosquito        | /                                 | ~21                | +59.3%                             | /                          | /            | (Schirtzinger et al., 2015)                                  |
| rDENV-4      | +ssRNA        | primate         | /                                 | ~24                | +99.0%                             | U                          | /            | (Schirtzinger et al., 2015)                                  |
| DNV          | +ssDNA        | insects         | 78.5%                             | ~21                | +87.5%                             | /                          | siRNA        | (Ma et al., 2011)                                            |
| DTrV         | +ssRNA        | fruit fly       | /                                 | ~21                | +                                  | /                          | siRNA        | (Wu et al., 2010)                                            |
| DTV          | dsRNA         | fruit fly       | /                                 | /                  | /                                  | /                          | siRNA        | (Wu et al., 2010)                                            |
| DXV          | dsRNA         | fruit fly       | 78~91%                            | ~21                | +                                  | +U                         | siRNA        | (Wu et al., 2010)                                            |
| FHV          | +ssRNA        | fruit fly       | /                                 | ~21                | ~50%                               | /                          | siRNA        | (Aliyari et al., 2008; Flynt et al., 2009; Han et al., 2011) |
| FHV          | +ssRNA        | nematode        | 93%                               | 23                 | ~50%                               | U                          | siRNA        | (Wu et al., 2010)                                            |
| HaSNPV       | dsDNA         | cotton bollworm | /                                 | ~20                | /                                  | /                          | siRNA        | (Jayachandran et al., 2012)                                  |
| HiPV         | +ssRNA        | planthopper     | 72.9%                             | 21~22              | +67.4%                             | U                          | siRNA        | (Xu et al., 2014)                                            |
| HoCV-1       | +ssRNA        | leafhopper      | 100%                              | ~21                | +95%                               | /                          | siRNA        | (Nandety et al., 2013)                                       |
| HoVRV        | dsRNA         | leafhopper      | 100%                              | ~21                | -                                  | /                          | siRNA        | (Nandety et al., 2013)                                       |
| IIV-6        | dsDNA         | insects         | /                                 | ~21                | +47%                               | /                          | siRNA        | (Bronkhorst et al., 2012)                                    |
| LGTV         | +ssRNA        | tick            | /                                 | ~22                | ~50%                               | A                          | siRNA        | (Schnettler et al., 2014)                                    |
| MNV          | +ssRNA        | mosquito        | /                                 | /                  | /                                  | /                          | /            | (Wu et al., 2010)                                            |

|      |        |                    |        |       |         |   |             |                                                                 |
|------|--------|--------------------|--------|-------|---------|---|-------------|-----------------------------------------------------------------|
| RSV  | -ssRNA | plant/insect       | /      | 20-24 | ~50%    | U | siRNA       | (Xu et al., 2012)                                               |
| RVFV | -ssRNA | insect/vertebrates | /      | 24~28 | -90%    | U | piRNA       | (Leger et al., 2013)                                            |
| RVFV | -ssRNA | insect/vertebrates | /      | ~21   | ~50%    | / | siR/miR     | (Leger et al., 2013; Sabin et al., 2013)                        |
| SFV  | +ssRNA | mosquito           | /      | ~21   | +       | / | siRNA       | (Siu et al., 2011)                                              |
| SINV | +ssRNA | mosquito           | 99%    | ~21   | +       | / | siRNA       | (Myles et al., 2008; Wu et al., 2010)                           |
| TBEV | +ssRNA | tick               | /      | ~22   | ~50%    | / | siRNA       | (Schnettler et al., 2014)                                       |
| VACV | dsDNA  | insect/mammal      | most   | ~21   | +68.8%  | / | siRNA       | (Sabin et al., 2013)                                            |
| VSV  | -ssRNA | insect/vertebrates | /      | ~21   | +44/53% | / | siRNA       | (Mueller et al., 2010)                                          |
| VSV  | -ssRNA | insect/vertebrates | /      | ~21   | +54.5%  | / | siR/miR     | (Sabin et al., 2013)                                            |
| WNV  | +ssRNA | fruit fly          | /      | ~25   | /       | / | siRNA       | (Chotkowski et al., 2008)                                       |
| WNV  | +ssRNA | mosquito           | 82~92% | ~21   | vary    | / | siRNA       | (Brackney et al., 2009)                                         |
| WSSV | dsDNA  | crustacean         | /      | ~22   | /       | / | miRNA/siRNA | (He and Zhang, 2012; Huang et al., 2014; Huang and Zhang, 2013) |

<sup>a</sup> Proportion of viral genome length covered by sRNA reads.

<sup>b</sup> Polarity of viral sRNA: “+” and “-” stand for sRNAs matching the positive and negative strands of virus genome, respectively. Numbers in percentage represent proportion of sRNAs matching the corresponding strand of virus genome.

<sup>c</sup> Nucleotide preference at 5' end of viral sRNA.

<sup>d</sup> Please find the references at the end of the Supplemental Materials.

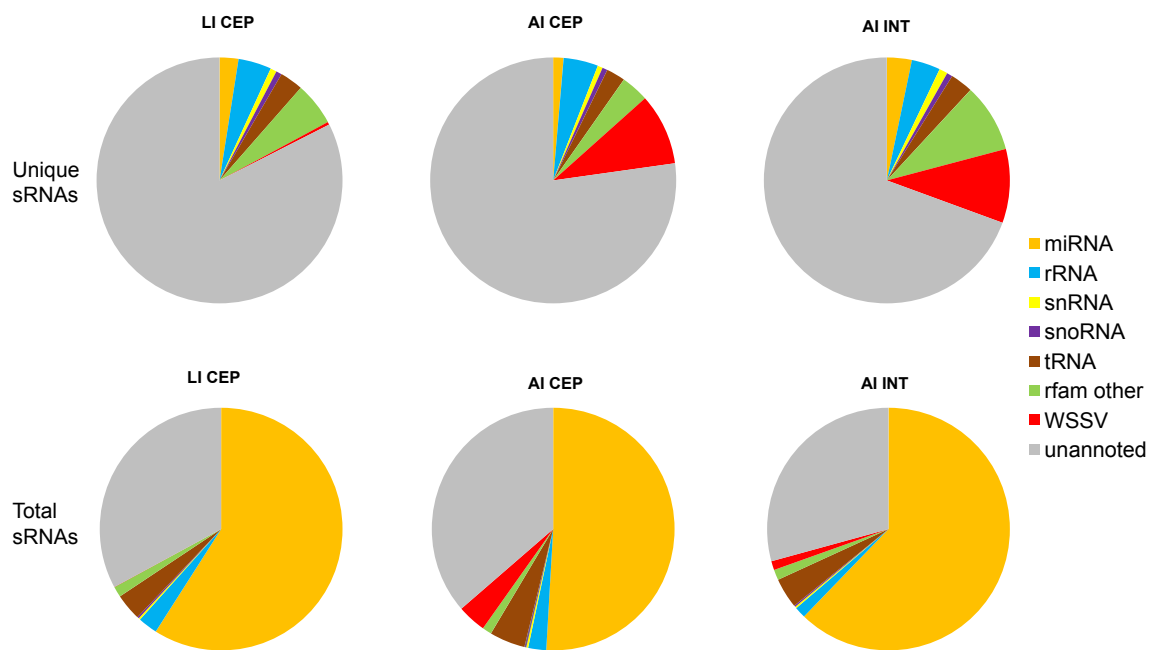

**FIG S1** Classification of sRNA sequencing reads. The clean reads (17-35nt) were annotated in a preferential order by comparing to the WSSV genome, the Rfam non-coding RNA database and miRBase miRNA database. CEP and INT stand for cephalothoraxes and intestine of *F. chinensis*, respectively. LI and AI represent latent or acute stages of infection.

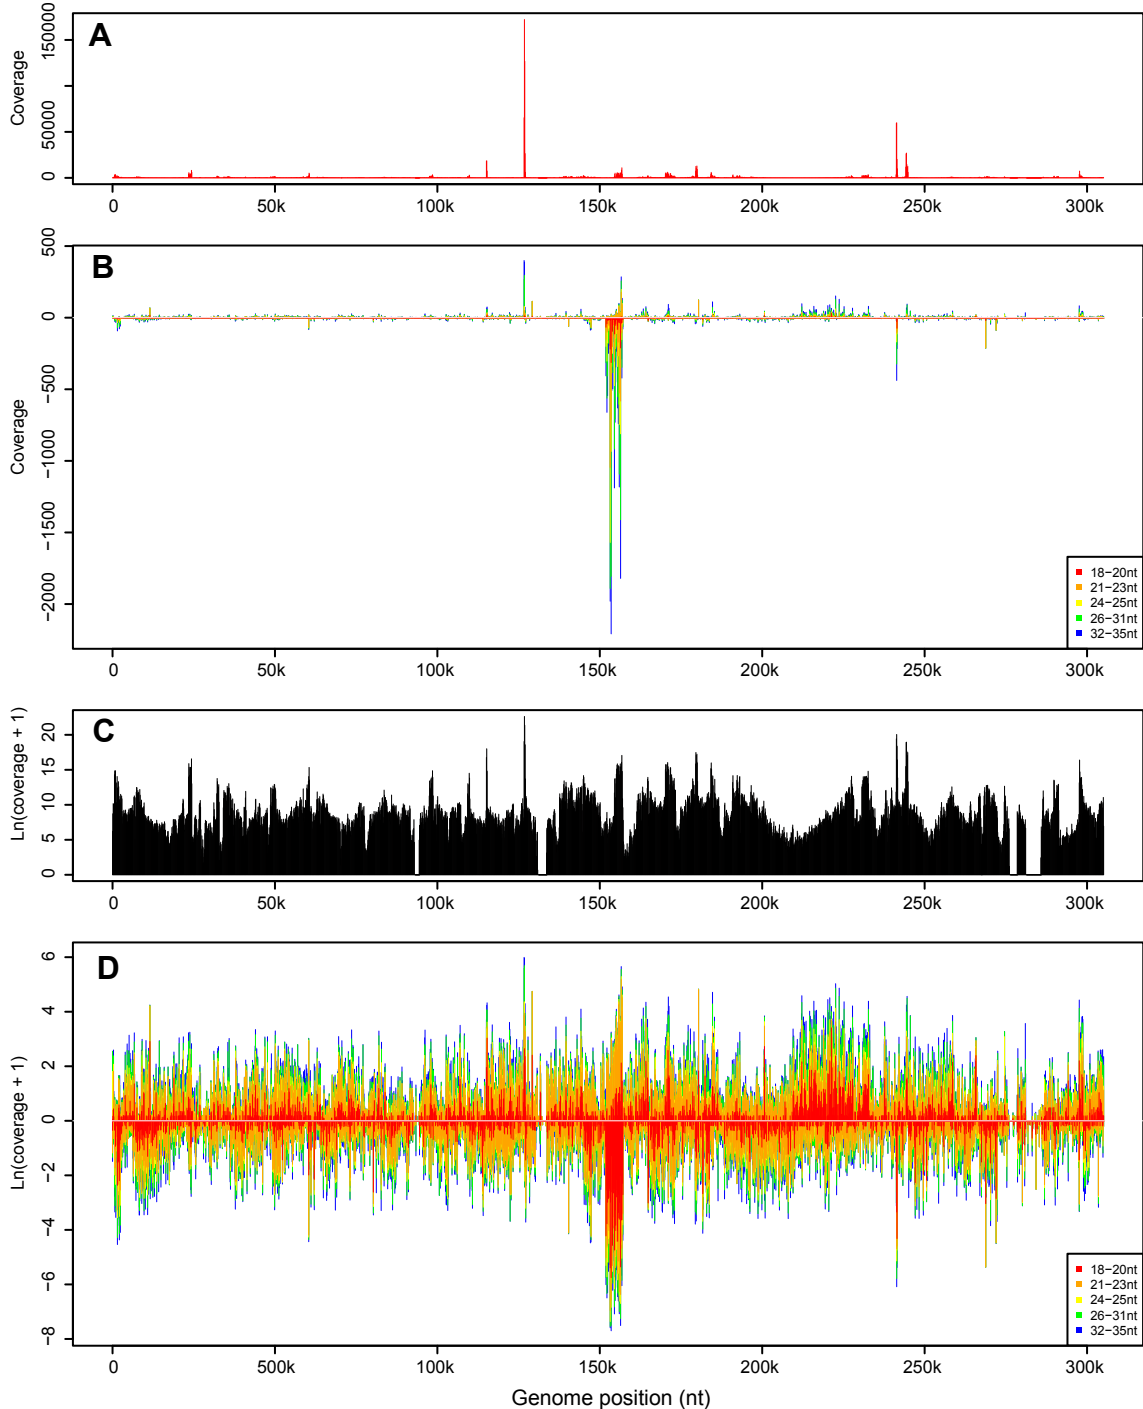

**FIG S2** Expression of sRNAs and mRNAs along WSSV genome in intestine of *F. chinensis* during acute infection. **(A)** Sequencing coverage of mRNA reads (orientation unknown). **(B)** Sequencing coverage of sRNA reads. Bars beneath coverage 0 represent sRNAs in the reverse direction of genome. The lengths of sRNAs are indicated with different colors. **(C)** Coverage of mRNA reads in logarithmic scale. **(D)** Coverage of sRNA reads in logarithmic scale. Bars beneath coverage 0 represent sRNAs in the reverse direction.

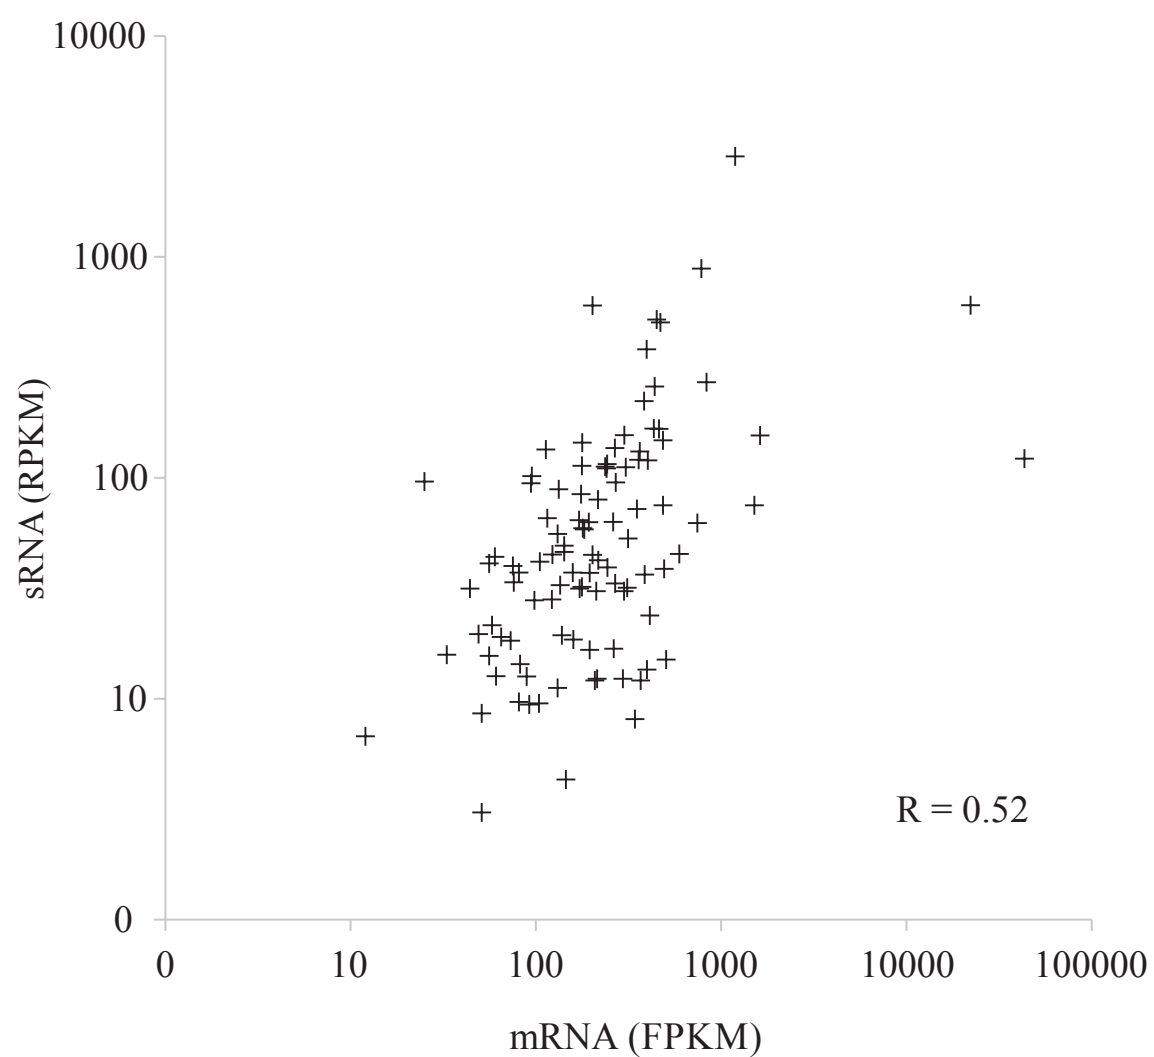

**FIG S3** Relations between the expressions of sRNA and mRNA of WSSV in cephalothoraxes of *F. chinensis* during acute infection.

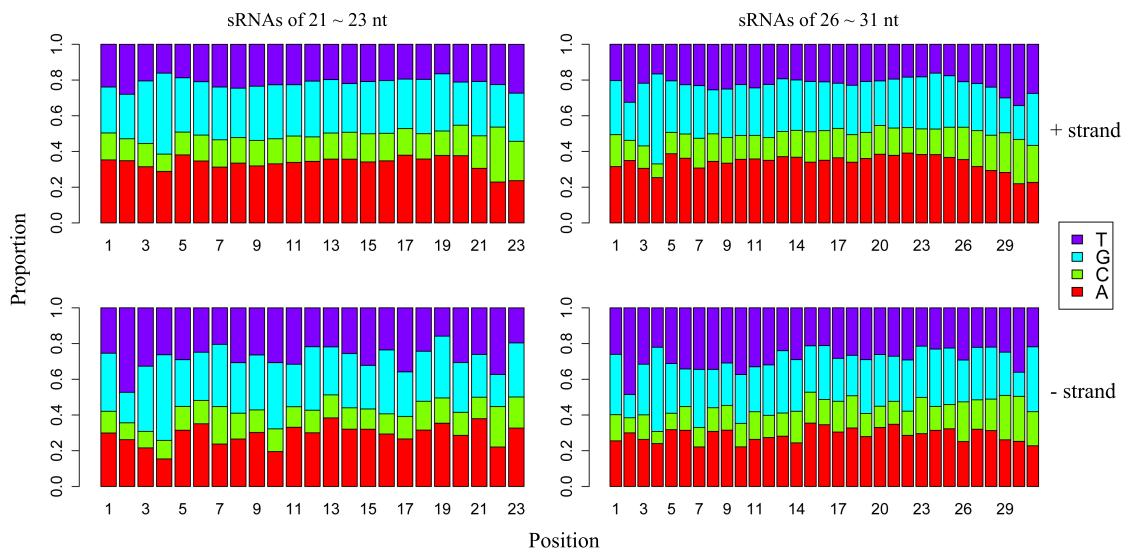

**FIG S4** WSSV sRNAs did not show nucleotide preference of canonical piRNA in shrimp cephalothoraxes during acute infection. Nucleotide frequencies of total sRNAs at each position are shown with bars in different colors. Figures in the upper row show sRNAs mapped to the WSSV genome in the 5'-3' direction, the lower two figures show sRNAs matched to the reverse complement direction of the genome. Figures in the left column show sRNAs of length 21~23 nt, which is most abundant in the AI sample. Figures in the right column show sRNAs of length 26-31 nt, which is in the range of canonical piRNA.



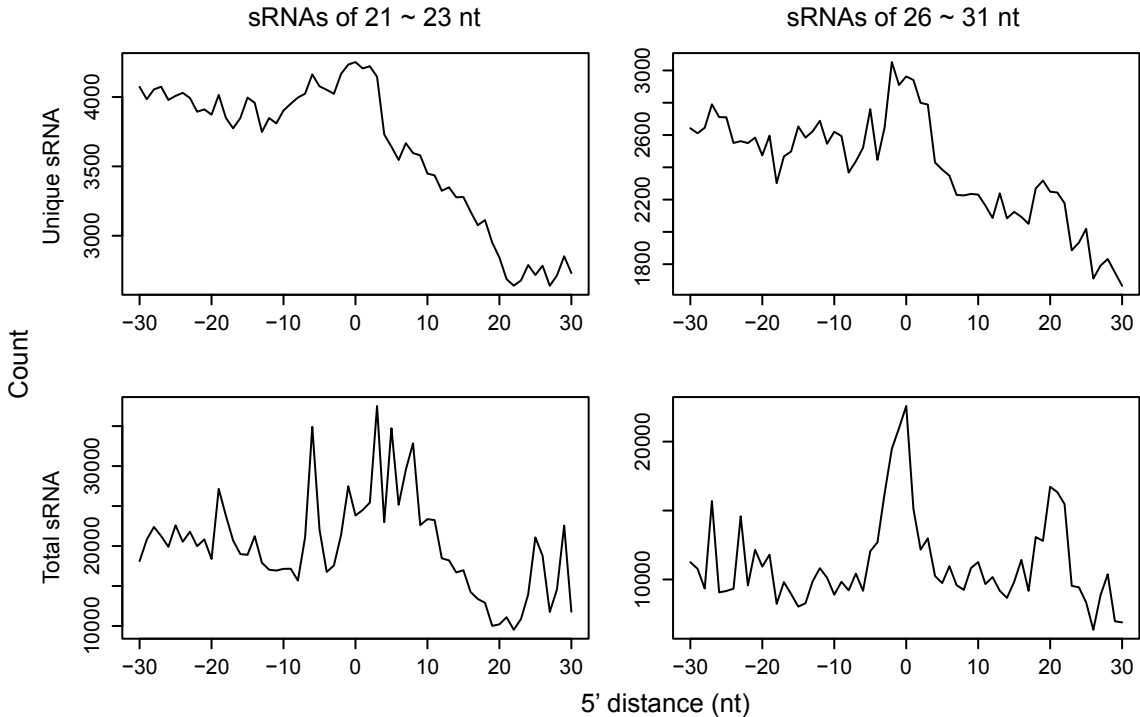

**FIG S5** WSSV sRNAs did not show typical 5' distances (10nt) of canonical piRNA in shrimp cephalothoraxes during acute infection. Frequency map of the distance between sRNAs that mapped to opposite strands of the WSSV genome.

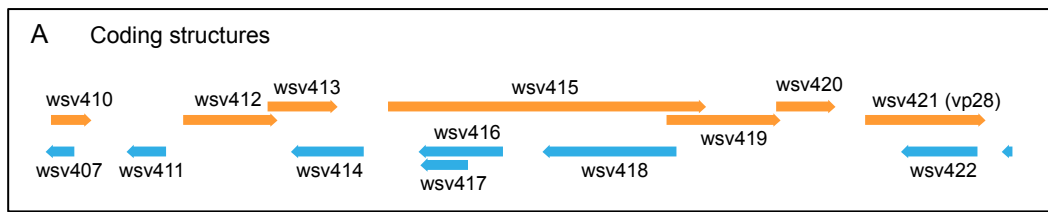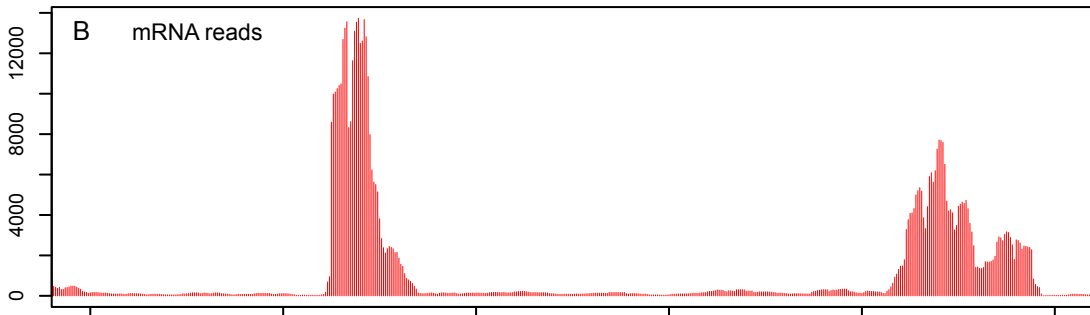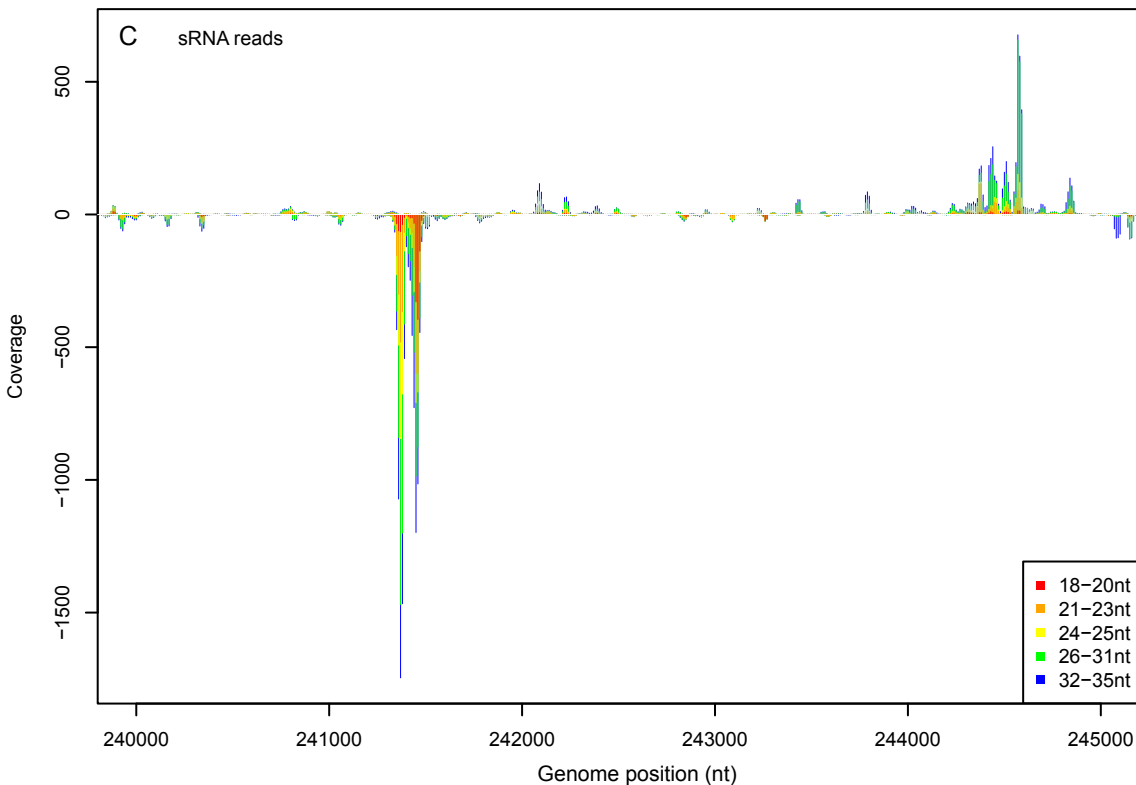

**FIG S6** Expression of sRNAs and mRNAs around vp28 gene in WSSV genome during acute infection in shrimp cephalothoraxes. **(A)** Coding structures. Arrows represent coding sequences annotation from NCBI. Orange arrows indicate CDS in plus strand, while cyan arrows indicate CDS in minus strand. **(B)** Sequencing coverage of mRNA reads (orientation unknown). **(C)** Sequencing coverage of sRNA reads. Bars beneath coverage 0 represent sRNAs in the reverse direction. The lengths of sRNAs are indicated with different colors.

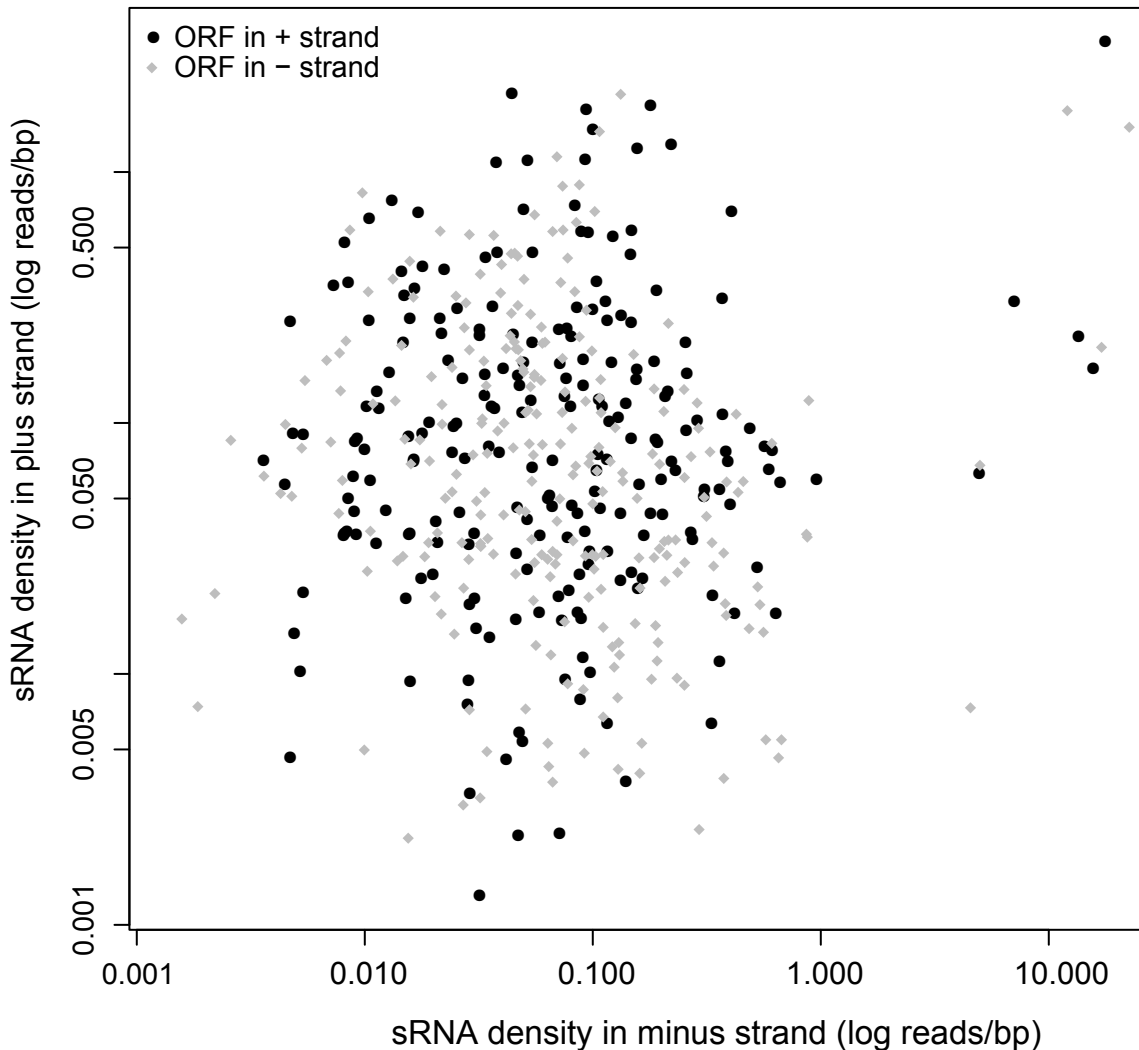

**FIG S7** Scatter plot of sRNAs from individual ORFs that map to the WSSV plus and minus strands in shrimp cephalothoraxes during acute infection. For each ORF, the total number of sRNAs derived from each strand was divided by the length of the ORF. The data were log-transformed. Black circles and grey diamonds indicate ORFs on the plus and minus strands of the WSSV genome, respectively.

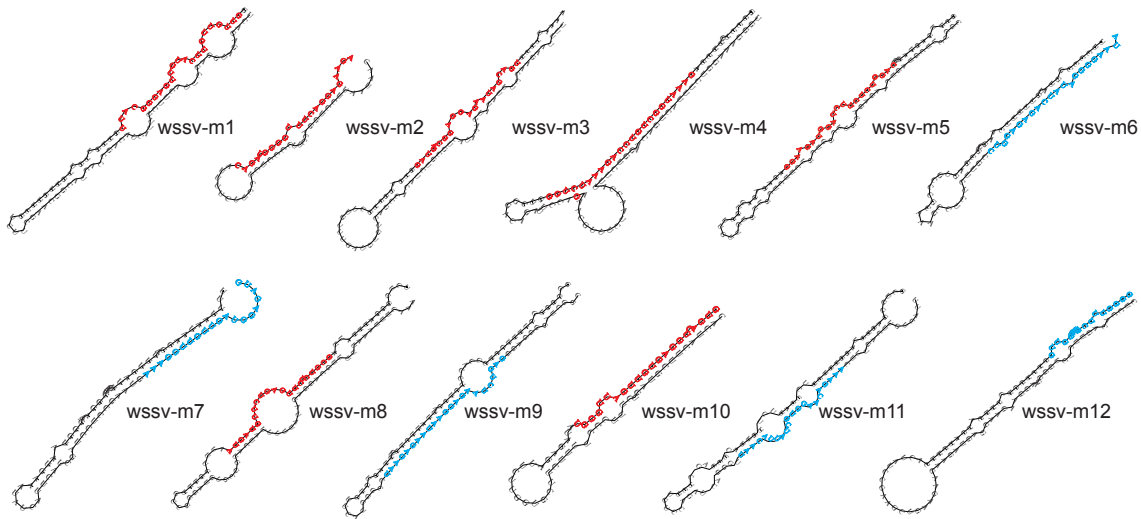

**FIG S8** Structures of candidate WSSV miRNA precursors. Pre-miRNA structures were predicted using RNAfold (MFE < -25 kcal/mole). Red color indicates mature miRNAs located at the 5' arm (5p) of the precursor, and blue indicates mature miRNAs located at the 3' arm (3p).

A

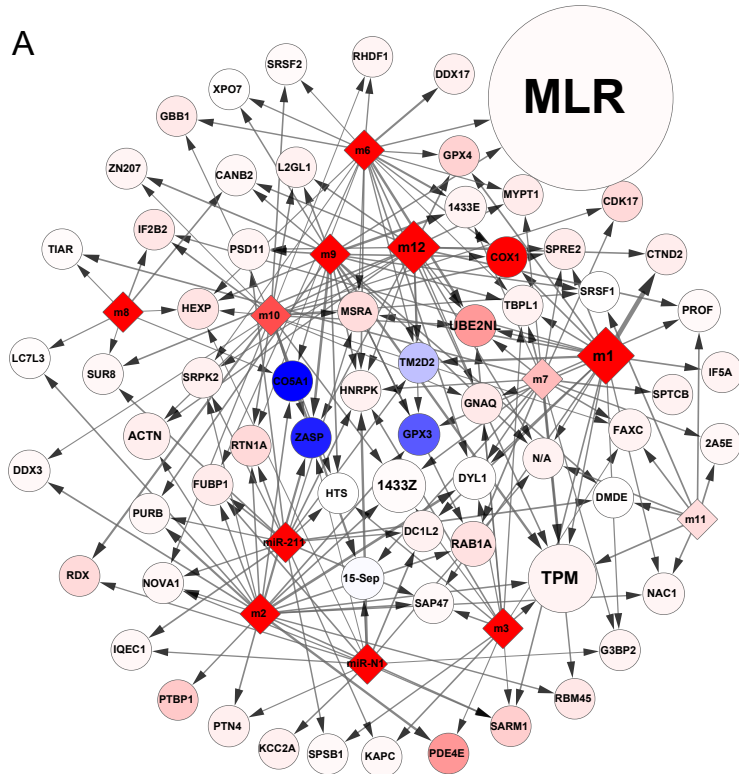

B

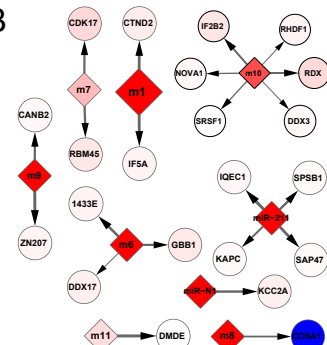

C

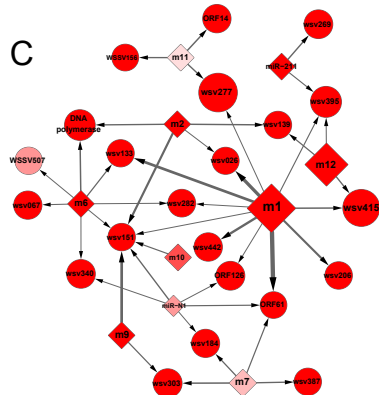

**FIG S9** Visualization of viral miRNA regulation network. Diamonds represent miRNAs, while circles represent target genes. Red or blue colors indicate up-regulation or down-regulation during acute infection, respectively. Size of a symbol indicates expression level of a miRNA or target gene. **(A)** Target genes that are shared in three hosts (*F. chinensis*, *L. vannamei* and *E. carincauda*). **(B)** Target genes with binding sites that are evolutionarily conserved. **(C)** Predicted regulation of WSSV miRNAs on its own mRNAs.

## Text S1

Small RNA reads from acute WSSV-infected cephalothorax of *F. chinensis* which overlapped with the vp28 siRNA probes of Huang et al. (2013).

```
>inf_0160452_x3
ACAACACTGTGACCAAGACCATCGAAACCCACA
>inf_0210481_x2
CACAACTGTGACCAAGACCATCGAAACCCACA
>inf_0317586_x2
CAACACTGTGACCAAGACCATCGAAACCCAC
>inf_0362208_x1
AACACTGTGACCAAGACCATCGAAACCCA
>inf_0364443_x1
AACACTGTGACCAAGACCATCGAAACCCACA
>inf_0747546_x1
CACAACTGTGACCAAGACCATCGAAACCCA
>inf_0857103_x1
CAACACTGTGACCAAGACCATCGAAACCCACA
>inf_0873829_x1
TGTGACCAAGACCATCGAAACCCACACAGGCA
>inf_1053362_x1
AACACTGTGACCAAGACCATCGAAACCCACACA
>inf_1174596_x1
ACTGTGACCAAGACCATCGAAACCCACA
>inf_1186243_x1
ACAACACTGTGACCAAGACCATCGAAACCCA
>inf_1207632_x1
TGACCAAGACCATCGAAACCCACACAGGC
>inf_1271115_x1
CAACACTGTGACCAAGACCATCGAAACCCACAC
>inf_1576499_x1
AACACTGTGACCAAGACCATCGAAACCCAC
```

## Text S2

Sequences of the 12 WSSV pre-miRNAs were conserved in 4 WSSV strains (gi58866698, gi426202315, gi721172032 and gi19481591).

MUSCLE (3.8) multiple sequence alignment

wssv-m1->gi426202315:152245-152334  
GGTTGTTGTTTCATGTTGAGGGCATTGTTGTTGTTGTTGTTTCGTCTTCGAACGGCATCACC  
wssv-m1->gi58866698:91297-91386  
GGTTGTTGTTTCATGTTGAGGGCATTGTTGTTGTTGTTGTTTCGTCTTCGAACGGCATCACC  
wssv-m1->gi721172032:147629-147718  
GGTTGTTGTTTCATGTTGAGGGCATTGTTGTTGTTGTTGTTTCGTCTTCGAACGGCATCACC  
wssv-m1->gi19481591:120829-120918  
GGTTGTTGTTTCATGTTGAGGGCATTGTTGTTGTTGTTGTTTCGTCTTCGAACGGCATCACC

\*\*\*\*\*

wssv-m1->gi426202315:152245-152334  
GACATCATTTCTTCATTTCGAGGTAGAGACT  
wssv-m1->gi58866698:91297-91386  
GACATCATTTCTTCATTTCGAGGTAGAGACT  
wssv-m1->gi721172032:147629-147718  
GACATCATTTCTTCATTTCGAGGTAGAGACT  
wssv-m1->gi19481591:120829-120918  
GACATCATTTCTTCATTTCGAGGTAGAGACT

\*\*\*\*\*

MUSCLE (3.8) multiple sequence alignment

wssv-m2->gi58866698:164455-164511  
AGAAGAGGACTTTGGGGTAGACATTTTCTTCCTCTCCCCTTCCAGGTCCTTAATAAC  
wssv-m2->gi721172032:221267-221323  
AGAAGAGGACTTTGGGGTAGACATTTTCTTCCTCTCCCCTTCCAGGTCCTTAATAAC  
wssv-m2->gi426202315:225865-225921  
AGAAGAGGACTTTGGGGTAGACATTTTCTTCCTCTCCCCTTCCAGGTCCTTAATAAC  
wssv-m2->gi19481591:194131-194187  
AGAAGAGGACTTTGGGGTAGACATTTTCTTCCTCTCCCCTTCCAGGTCCTTAATAAC

\*\*\*\*\*

MUSCLE (3.8) multiple sequence alignment

wssv-m3->gi58866698:285122-285215  
AAAATTTCTTGACGATAAGAGGAGGCAGTAGGTGAGGCTGCTTGTTTGATGTGTCAGCCA  
wssv-m3->gi426202315:236397-236490  
AAAATTTCTTGACGATAAGAGGAGGCAGTAGGTGAGGCTGCTTGTTTGATGTGTCAGCCA  
wssv-m3->gi721172032:241024-241117  
AAAATTTCTTGACGATAAGAGGAGGCAGTAGGTGAGGCTGCTTGTTTGATGTGTCAGCCA

wssv-m3->gi19481591:271018-271111  
AAAATTTCTTGACGATAAGAGGAGGCAGTAGGTGAGGCTGCTTGTGTTGATGTGTCAGCCA

\*\*\*\*\*

wssv-m3->gi58866698:285122-285215  
CATCTGCGTCATACATTATATTTCCAAGAATTTT  
wssv-m3->gi426202315:236397-236490  
CATCTGCGTCATACATTATATTTCCAAGAATTTT  
wssv-m3->gi721172032:241024-241117  
CATCTGCGTCATACATTATATTTCCAAGAATTTT  
wssv-m3->gi19481591:271018-271111  
CATCTGCGTCATACATTATATTTCCAAGAATTTT

\*\*\*\*\*

MUSCLE (3.8) multiple sequence alignment

wssv-miR-211-a->gi426202315:272850-27294  
GCCCTGTTCCAGAAATGGCTGTCCAGAAATCTGGGTCCGACAGATTCCAGAAACGTTTCT  
wssv-miR-211-a->gi58866698:28422-28515  
GCCCTGTTCCAGAAATGGCTGTCCAGAAATCTGGGTCCGACAGATTCCAGAAACGTTTCT  
wssv-miR-211-a->gi721172032:277471-27756  
GCCCTGTTCCAGAAATGGCTGTCCAGAAATCTGGGTCCGACAGATTCCAGAAACGTTTCT  
wssv-miR-211-a->gi19481591:173-266  
GCCCTGTTCCAGAAATGGCTGTCCAGAAATCTGGGTCCGACAGATTCCAGAAACGTTTCT

\*\*\*\*\*

wssv-miR-211-a->gi426202315:272850-27294  
AACCATTTCTGGAACAGTCATTTCTGGAAAGGGT  
wssv-miR-211-a->gi58866698:28422-28515  
AACCATTTCTGGAACAGTCATTTCTGGAAAGGGT  
wssv-miR-211-a->gi721172032:277471-27756  
AACCATTTCTGGAACAGTCATTTCTGGAAAGGGT  
wssv-miR-211-a->gi19481591:173-266  
AACCATTTCTGGAACAGTCATTTCTGGAAAGGGT

\*\*\*\*\*

MUSCLE (3.8) multiple sequence alignment



wssv-miR-211-b->gi426202315:273818-27390  
CTGTTCCAGAAATGGCTGTCCAGAAATCTGGGTCGGCCAGATTCCAGAAACGTTTCTAAC  
wssv-miR-211-b->gi58866698:29716-29803  
CTGTTCCAGAAATGGCTGTCCAGAAATCTGGGTCGGCCAGATTCCAGAAACGTTTCTAAC  
wssv-miR-211-b->gi19481591:1141-1228  
CTGTTCCAGAAATGGCTGTCCAGAAATCTGGGTCGGCCAGATTCCAGAAACGTTTCTAAC  
wssv-miR-211-b->gi721172032:278439-27852  
CTGTTCCAGAAATGGCTGTCCAGAAATCTGGGTCGGCCAGATTCCAGAAACGTTTCTAAC

\*\*\*\*\*

wssv-miR-211-b->gi426202315:273818-27390  
CATTTCTGGAACAGTCATTTCTGGAAAG  
wssv-miR-211-b->gi58866698:29716-29803  
CATTTCTGGAACAGTCATTTCTGGAAAG  
wssv-miR-211-b->gi19481591:1141-1228  
CATTTCTGGAACAGTCATTTCTGGAAAG  
wssv-miR-211-b->gi721172032:278439-27852  
CATTTCTGGAACAGTCATTTCTGGAAAG

\*\*\*\*\*

MUSCLE (3.8) multiple sequence alignment

wssv-miR-211-c->gi19481591:820-903  
TCCAGAAATGGCTGTCCAGAAATCTGGGTCGGCCAGATTCCAGAAACGATTCTAACCATT  
wssv-miR-211-c->gi426202315:273497-27358  
TCCAGAAATGGCTGTCCAGAAATCTGGGTCGGCCAGATTCCAGAAACGATTCTAACCATT  
wssv-miR-211-c->gi721172032:278118-27820  
TCCAGAAATGGCTGTCCAGAAATCTGGGTCGGCCAGATTCCAGAAACGATTCTAACCATT  
wssv-miR-211-c->gi58866698:29395-29478  
TCCAGAAATGGCTGTCCAGAAATCTGGGTCGGCCAGATTCCAGAAACGATTCTAACCATT

\*\*\*\*\*

wssv-miR-211-c->gi19481591:820-903  
TCTGGAACAGTCATTTCTGGAAAG  
wssv-miR-211-c->gi426202315:273497-27358  
TCTGGAACAGTCATTTCTGGAAAG  
wssv-miR-211-c->gi721172032:278118-27820  
TCTGGAACAGTCATTTCTGGAAAG  
wssv-miR-211-c->gi58866698:29395-29478  
TCTGGAACAGTCATTTCTGGAAAG

\*\*\*\*\*

MUSCLE (3.8) multiple sequence alignment

wssv-miR-N1->gi19481591:231993-232086  
GCTTGAGTATTGGCAGGTCTCTTCTAGGTAGAAGGAGAGAGAGTGCTTGTTGTGTTGCTC  
wssv-miR-N1->gi721172032:258800-258893  
GCTTGAGTATTGGCAGGTCTCTTCTAGGTAGAAGGAGAGAGAGTGCTTGTTGTGTTGCTC  
wssv-miR-N1->gi426202315:263397-263490  
GCTTGAGTATTGGCAGGTCTCTTCTAGGTAGAAGGAGAGAGAGTGCTTGTTGTGTTGCTC  
wssv-miR-N1->gi58866698:202307-202400  
GCTTGAGTATTGGCAGGTCTCTTCTAGGTAGAAGGAGAGAGAGTGCTTGTTGTGTTGCTC

\*\*\*\*\*

wssv-miR-N1->gi19481591:231993-232086  
TTCTGCTGGCTTGCAGAGAACTGATGCTTCTGGC  
wssv-miR-N1->gi721172032:258800-258893  
TTCTGCTGGCTTGCAGAGAACTGATGCTTCTGGC  
wssv-miR-N1->gi426202315:263397-263490  
TTCTGCTGGCTTGCAGAGAACTGATGCTTCTGGC  
wssv-miR-N1->gi58866698:202307-202400  
TTCTGCTGGCTTGCAGAGAACTGATGCTTCTGGC

\*\*\*\*\*

MUSCLE (3.8) multiple sequence alignment

wssv-m6->gi426202315:173896-173966  
TTCCCCGGTATGTTTTTCAAGCTGCGAGTGCCCGCAAAGCCTCTCTTGCCTGGAGAGACT  
wssv-m6->gi19481591:207488-207558  
TTCCCCGGTATGTTTTTCAAGCTGCGAGTGCCCGCAAAGCCTCTCTTGCCTGGAGAGACT  
wssv-m6->gi721172032:178523-178593  
TTCCCCGGTATGTTTTTCAAGCTGCGAGTGCCCGCAAAGCCTCTCTTGCCTGGAGAGACT  
wssv-m6->gi58866698:222694-222764  
TTCCCCGGTATGTTTTTCAAGCTGCGAGTGCCCGCAAAGCCTCTCTTGCCTGGAGAGACT

\*\*\*\*\*

|                                    |            |
|------------------------------------|------------|
| wssv-m6->gi426202315:173896-173966 | ATAGGGAATA |
| wssv-m6->gi19481591:207488-207558  | ATAGGGAATA |
| wssv-m6->gi721172032:178523-178593 | ATAGGGAATA |

wssv-m6->gi58866698:222694-222764 ATAGGGGAATA  
\*\*\*\*\*

MUSCLE (3.8) multiple sequence alignment

wssv-m7->gi58866698:259013-259097  
TTTTAATAACCATTTTCATTGCATCCGGAAAGGGTAATGAAATATCATTTCATCGATCCTCC  
wssv-m7->gi426202315:15003-15087  
TTTTAATAACCATTTTCATTGCATCCGGAAAGGGTAATGAAATATCATTTCATCGATCCTCC  
wssv-m7->gi721172032:10394-10478  
TTTTAATAACCATTTTCATTGCATCCGGAAAGGGTAATGAAATATCATTTCATCGATCCTCC  
wssv-m7->gi19481591:288700-288784  
TTTTAATAACCATTTTCATTGCATCCGGAAAGGGTAATGAAATATCATTTCATCGATCCTCC

\*\*\*\*\*

|                                   |                           |
|-----------------------------------|---------------------------|
| wssv-m7->gi58866698:259013-259097 | GAATGAAAGGTTGTTGATGGAGATG |
| wssv-m7->gi426202315:15003-15087  | GAATGAAAGGTTGTTGATGGAGATG |
| wssv-m7->gi721172032:10394-10478  | GAATGAAAGGTTGTTGATGGAGATG |
| wssv-m7->gi19481591:288700-288784 | GAATGAAAGGTTGTTGATGGAGATG |

\*\*\*\*\*

MUSCLE (3.8) multiple sequence alignment

wssv-m8->gi426202315:54512-54606  
TCTGGGGATTTATTAGCGTCTCTTGAGTCTTGTAGTAATTCGTTTGCCGGGATGTGCGG  
wssv-m8->gi721172032:49896-49990  
TCTGGGGATTTATTAGCGTCTCTTGAGTCTTGTAGTAATTCGTTTGCCGGGATGTGCGG  
wssv-m8->gi19481591:22069-22163  
TCTGGGGATTTATTAGCGTCTCTTGAGTCTTGTAGTAATTCGTTTGCCGGGATGTGCGG  
wssv-m8->gi58866698:286613-286707  
TCTGGGGATTTATTAGCGTCTCTTGAGTCTTGTAGTAATTCGTTTGCCGGGATGTGCGG

\*\*\*\*\*

|                                   |                                   |
|-----------------------------------|-----------------------------------|
| wssv-m8->gi426202315:54512-54606  | TACTATTTTATAGAGGACGTTTTTAAATTTCAA |
| wssv-m8->gi721172032:49896-49990  | TACTATTTTATAGAGGACGTTTTTAAATTTCAA |
| wssv-m8->gi19481591:22069-22163   | TACTATTTTATAGAGGACGTTTTTAAATTTCAA |
| wssv-m8->gi58866698:286613-286707 | TACTATTTTATAGAGGACGTTTTTAAATTTCAA |

TACTATTTTTATAGAGGACGTTTTTAAATTTCAA

\*\*\*\*\*

MUSCLE (3.8) multiple sequence alignment

wssv-m9->gi721172032:251521-251611  
GGCGGTGCTTTTCTCCACCTCTCCATTATTCTTCTTTAGTCTTTCATGGGCCTAAGA  
wssv-m9->gi426202315:246894-246984  
GGCGGTGCTTTTCTCCACCTCTCCATTATTCTTCTTTAGTCTTTCATGGGCCTAAGA  
wssv-m9->gi58866698:2652-2742  
GGCGGTGCTTTTCTCCACCTCTCCATTATTCTTCTTTAGTCTTTCATGGGCCTAAGA  
wssv-m9->gi19481591:281516-281606  
GGCGGTGCTTTTCTCCACCTCTCCATTATTCTTCTTTAGTCTTTCATGGGCCTAAGA

\*\*\*\*\*

wssv-m9->gi721172032:251521-251611  
GAATAAGGAGAATCTGAGGGAGGGGATCGGC  
wssv-m9->gi426202315:246894-246984  
GAATAAGGAGAATCTGAGGGAGGGGATCGGC  
wssv-m9->gi58866698:2652-2742  
GAATAAGGAGAATCTGAGGGAGGGGATCGGC  
wssv-m9->gi19481591:281516-281606  
GAATAAGGAGAATCTGAGGGAGGGGATCGGC

\*\*\*\*\*

MUSCLE (3.8) multiple sequence alignment

wssv-m10->gi721172032:252819-252885  
GTGACTGGAGTGTGATTGGGTATAGAGATTCTTGGTGCTTCTTTTCCCTTTCTGATGCT  
wssv-m10->gi19481591:282814-282880  
GTGACTGGAGTGTGATTGGGTATAGAGATTCTTGGTGCTTCTTTTCCCTTTCTGATGCT  
wssv-m10->gi58866698:3950-4016  
GTGACTGGAGTGTGATTGGGTATAGAGATTCTTGGTGCTTCTTTTCCCTTTCTGATGCT  
wssv-m10->gi426202315:248192-248258  
GTGACTGGAGTGTGATTGGGTATAGAGATTCTTGGTGCTTCTTTTCCCTTTCTGATGCT

\*\*\*\*\*

|                                     |         |
|-------------------------------------|---------|
| wssv-m10->gi721172032:252819-252885 | TCATCAC |
| wssv-m10->gi19481591:282814-282880  | TCATCAC |
| wssv-m10->gi58866698:3950-4016      | TCATCAC |

wssv-m10->gi426202315:248192-248258 TCATCAC  
\*\*\*\*\*

MUSCLE (3.8) multiple sequence alignment

wssv-m11->gi19481591:230394-230488  
GCTGGGAGTCTAGGTTTCTTCCATTCTTGTTACCCCAGCTCTTGTCCAGATCAGGGTTA  
wssv-m11->gi58866698:200707-200801  
GCTGGGAGTCTAGGTTTCTTCCATTCTTGTTACCCCAGCTCTTGTCCAGATCAGGGTTA  
wssv-m11->gi721172032:257200-257294  
GCTGGGAGTCTAGGTTTCTTCCATTCTTGTTACCCCAGCTCTTGTCCAGATCAGGGTTA  
wssv-m11->gi426202315:261797-261891  
GCTGGGAGTCTAGGTTTCTTCCATTCTTGTTACCCCAGCTCTTGTCCAGATCAGGGTTA

\*\*\*\*\*

wssv-m11->gi19481591:230394-230488  
ACATTATCGTGGAACAGAACTTTGACTTGTCATT  
wssv-m11->gi58866698:200707-200801  
ACATTATCGTGGAACAGAACTTTGACTTGTCATT  
wssv-m11->gi721172032:257200-257294  
ACATTATCGTGGAACAGAACTTTGACTTGTCATT  
wssv-m11->gi426202315:261797-261891  
ACATTATCGTGGAACAGAACTTTGACTTGTCATT

\*\*\*\*\*

MUSCLE (3.8) multiple sequence alignment

wssv-m12->gi19481591:118951-119050  
TGGGGGTTTCGTTTGTGGTTGCTCTCCTCCTTCATCATCTTCACTATCCGAAGCTGAAGA  
wssv-m12->gi58866698:89419-89518  
TGGGGGTTTCGTTTGTGGTTGCTCTCCTCCTTCATCATCTTCACTATCCGAAGCTGAAGA  
wssv-m12->gi426202315:150367-150466  
TGGGGGTTTCGTTTGTGGTTGCTCTCCTCCTTCATCATCTTCACTATCCGAAGCTGAAGA  
wssv-m12->gi721172032:145751-145850  
TGGGGGTTTCGTTTGTGGTTGCTCTCCTCCTTCATCATCTTCACTATCCGAAGCTGAAGA

\*\*\*\*\*

wssv-m12->gi19481591:118951-119050  
AGAAGATGAGGAAGAAGGAAGGGTCTCTTGACACCTCTA

wssv-m12->gi58866698:89419-89518  
AGAAGATGAGGAAGAAGGAAGGGGTCTCTTGACACCTCTA  
wssv-m12->gi426202315:150367-150466  
AGAAGATGAGGAAGAAGGAAGGGGTCTCTTGACACCTCTA  
wssv-m12->gi721172032:145751-145850  
AGAAGATGAGGAAGAAGGAAGGGGTCTCTTGACACCTCTA

\*\*\*\*\*

## Text S3

WSSV primary miRNA (pri-miRNA) sequences.

>Unigene31474\_All pri-miR(wssv-m2) size 5334

CCCCAGCCACAGCAGCAGCAGTAACAGCAAGCAGGCATCAGTCAGCCAGGTTCCAGCATAACAAATCAAATT  
GGCAGCAAATAGCAGCAGCAGCAGCAGCAACCACCACAGCCGCCAATAATATTCCTCCTCCCCCTACT  
CCTCAACAACAATCACCCAGTAATATTCCTCCTCCCCAGCAGCAGCAGCAGCCCTTCCGGTTCAACTCA  
TTTCTAGTCCCCCTCCTCCTCTATACCTAATACTGCTCCTTCTCCACCTATTTCCCGTGTAAAGATTTGACTC  
TCGTTCTACTACCCCTCAACCTCCACCTACACCAGTCTACCCAAGCCTACTCCTCTTCCCTCCTCCGTCTACAGC  
AAGAGCAGAAGAAGAAAACGCTACTGATATGTCCTTTACTGATATAGACTCTGAGCTTGGCAGTATTGATTTT  
GATCTTCTCCCGCTACTCCAGGGAGGAACGTTGAAGAGATAATAAAAGCGCAACGTCAAGCTGTCAAGGA  
AACGGGAGTCAGAGGAGAAGAAGAAGAAGAGGAGGCATTATTGCACCAATTATTCGTCAACCGCGT  
ACACCAGGAAATTTTAGAGATGAACTTTTAGATGTCAATGAATCCATCTATGGCTCAGACATTGAACCAGCAG  
CAGCAGCAGCAGCGTTTACTGGGATATGGGGTTAGACGATTTAAATGGGGATGAACCATATGAATTTGAAT  
AAAACACAACATGTAAAACATATAATTTTATTGGTAAAAATAAAGGTATACATTTAATGCTTCTTTGTTTTCTT  
TGCCAAAGATTTCTTGACTTTCCTCTAATGTCTTTTCATGGCATCAATTTTCTTAATCATTACATGCATAAAGTCT  
TGGATTGCAGCAGCATCAGTATCAGTTGAAGAAGAGGTAGAAGTAGTAGAACCATCATCAGCAGCAGCAGC  
AGCATTGTCGTCAGCGGTTTCATCTTTGGACGAGCAGGATTTGATACTCTTAAATGTATAGTTTACAAAAACT  
GCACCATAGTCATCCAAAGCATTTCGGTCTGGTACTCTTCATGGGTCAATTTACAAGTATACAATGGGTCATT  
TAAAGATGAAGTATAAATACATAGGTTCAAATCACTAGGTGAAGTTGCAGTCATATTCTTATTGAGCAAATAG  
TAGACTCGCCGGTAAAGGCGCTAACACTCTTGACATCCTTCTTTAGACCGTTAAATCTAATCTTCTATTCTAT  
CAATAATATTCCTACACAACCTTTGTTTTAGGTGCAGTTTCAGCTACAAGTTTTACAGCGTGTCTATGGTTAACA  
ATAAAACTGCAAAGTTTGGGTGTACAACAAATCCACACCTCCACATGTTTCTAGATGTCAAAAACATGTTCT  
CGTTCCAGATGCTCTTTTTCTTTGTAGAAGAAAGGAGCAAGATAGAGCCAGAACAGAAGATGAAGGAGC  
TACAATAGACGAGACGGAAGAGACTGAATTTGAACTAGAAGGAGTTTGTACACACATGCCATTATTATTGCT  
CATACCAGATGAGATCTTCTCCTATTGAATTTGTCTTTTTCTTTTCAGTGAGAGAAGAGCTAGGAGAAATAT  
TATAGAATGGAAGAACCTTATTCTTATTAATATTGAAAAAGGTGTCATGCTTAGACAAATGCAAAATATCCTTC  
TCTAGCTTGCTGTTGTAGTAGAATCAACATCCTCATCGTTTAAATGAATCATATTTGGGTGAAATTGTCAAAT  
GCCCTTTCGGTCTATGGTGTTAACGTACAATTTGCCACATGAGGCCTTATCTAGTCTGCGCTTGAAAAATCA  
ACAGGTATACTAAAGGGGCCTACAATATGTGAATCCACACGCGTACTGACTCCAAAACAGTTTCATATTTAT  
CATCTGTTCCATTGATTTTCTATTGATTTTGACATCGCTAAACACAAACCTTGAGACCTCATCAAGGGTATTG  
ATTGTGCTAGAATCCTTCAAGAAACCGGGAGGGATTTTCTGTTCATCCAGCTTATTCCAGAGATCAAACAT  
TAATTGCAATAGAACTACCATCGAATTTTACACAAACTTTTACAAATTTTCTAATGACTTGATCCCCAATAC

TGTTGAATTTTTGACCCTTCTTCTCCCTCCCTTGCGAACTTGCTTCTGTTGTTCTACGTCCATACTTTCTTCCA  
TTTTATCCTCCTCCTTCTCCTTCTCCTCCTCCTCCACAATATCGGTTTCTTCGTTATCATTATTGTTGTTGATG  
TACTGGAGCACATCGCAAATCCTGTTCTGTCATTACAGTCAGGTACCACAGGCAAGTGGAAAGAAAAGTG  
AACGTCATGGGTATAGTTGTCTCCTTCCAATTCTCTTAAATCAGATTGAACAAGAACATTGGTACAAACTTGC  
TAAACGCATGGTATTCTTCATATGTCCTACGAATAGCATTAAACGCTCACAGTACCTTTGCATACTTGTGTTTGC  
GCTTAGGGGTGTTAACGTTTTCTAGGCTCCAATCTTAATATTCTCCAGTACTTCTTCAAAGTAAGCGATCGG  
GTCCTCCAAGAACTCGGCAAACAATCCCCTTGGTGAGACAAAACATCCATTTCAATTTCTCAATATCTACA  
GCTTGAGACCTGCATTCTCATAACAAGCGAGTTACCTCCCTCTCATATCTAGTCAGTCTAGTGAATGAGCTCCT  
CATGATTTCAATTTCAAGATCTTCAAAGTCTTGACATTCTCTTAAATGTGCTGGAAGCATCAGACAGTCCAC  
AAAGACGTTGACCGAATATTTAGACAAATATGAAGCCGAGCCATTGACATTACTGCGTGGCATTGTTTATGAA  
ACTGAGGGGAATTAATTGATAGTTTCTTGTGATGACCAGCTTGTGTTGTTGTTCTGGCGTAGACGATGAA  
GAAGGAGATGATGATTCTGTGCAACCTTTCCCCTTCATCATTGTTTTCATCATTGTTGATGGTCTTGGTG  
TTCATCGTTAGATGATGAAGCACTAGAGGTACGCTTGCCTTCATTTTGGAGGGCTTTCTGATGCCATTTTG  
AAGGAGAATACGTTAGGTATGACTGTGCCAGAATGGAGTTTCGATTTACCCACGCAAATAGTGCATTATTCA  
CATTAGATTCCGTGTTGGTTTTGAAGCACGAGGAAGAAATGTGCTGTTTCCATACAGACTCTTCTTTTGTCC  
TTCATATTTACCTTAATGTTGGTAGAGTTGGCGTTAAACATTCCTCCAAATATTTAGACTTGCAAATATCTTG  
AGCCATCTGATGTGCCACAATTGATGTGACAACCTCATCAAACAACAAACCCTTAGCAAATTGTTGACTTTCT  
TCAGTCCAAATGGTTGGACGGCGACGGATACTATCGTCCATGGTATTCAAACACTCTTGGAGTTTGTGGTG  
AATACACGGTAACTGCTCATAGATGATGGATTATTACAAATTTAGCAAGAGAATTTGCATAGTTTCATACAA  
AATATTTTTCAGTTCTCTCGTCGTTTGGGGCCATGAAGGAATTTTCACTGTAGCTTCAGTTTGGGGGCATAAT  
GCAGTAGCGTCAACGGCATCGTCATCATACCATCATCTTCGTTATTGATACTACTGCTACTATTGTTACCCCA  
GAAGTAATTTGAGTGCAGTTTCACTTAAACCCTTCTCATTGTTTCATAGTAGAAAGCTTGGCTAATTTCTT  
CATAACAAGAGCATCTTCTGAACCTTCATACTTGTACTTTTCGTTCTCATCAATTTCTTCTTCTTCTCCCTCC  
CTCCACAACCTGCTTACCTTCGTATGGTGTAGGAGGAGGAAGTGTGGAGAGGAAGACGATGACGATGAAT  
TTTCTCCATCTTCTCCGTCTTGATGGGGGAAGGACTAGCATCAAAAAGACGCCTGTGATTCGACCACAA  
TATTCATAGAACGTTCTTCATGTTCTTCATTATTAACAGTAACATCGATGCAGTCAGCAAACAGCACAAGTCA  
TTCATATCACTAATTGCACATTGTTAGAAAATCCACTGTGATGTGACCACACCGTTTGGCTTGCACCAACT  
AGCCGTGTTTTACTACTCGGTTATCATATAGAGCAATTGTTCTTCCCGTCTCCACTGTAGTCGTACACGGCCA  
CATGAGGTGTAATCGCTGGTGCATTCATGCGCTTCTTCTCCTCCAAATCTTCGGTGTGACACCTCATTCTG  
GCATCATTCTTCTTCTCGTCAAAGACTGCGTCTCAATTGAAGTGTGTAATAATCTTCCAAGTTGTCATATTC  
TGTACGTCCAAACATGCACAGAACAGGAAGCTTGGCCATCCTCAAACCAGTCATGTTAGGGTTTGAATACC  
TGCATTATGTCGAAAACCTGGTACATATTTAGGTAGAGATCTTCTAGCCCAACACCAGTCAAGAAAACCTGCA  
TATGATTTCCATCTTCTGTAGAAGTTTGAACCCAACAAGAGGATAGGTTGTTTCAAGCATAAAACAATCCC  
TGGGTTCTTCAGAGAAAACCTGGTTGTTGTTGTTCTCAAATGAGGAGACGTTGTGTTTTTGTACTACTTGA  
CACTGCATACTTGCTCCAATCTTGAACAGTTGGCGTTAACTTGAGACCTTTGCACACTCGCCCCCTGGAG  
TAGATTTCTAAATCCTCGACAGAAAACACTTTTTCTGGGCTGGAAGTTACTACTGTTCTTGGCTTCACTTTCAA  
TCTTGGTTCTGCGCACACTTTCAAGTACATTTCAATTTCTTCTGATGGTTCGATTCAATGGAATTATCTGCAGTG  
CTCTTAACGGCTGATACTCGTTGATAATATCGTCCAACATAGCCTTGCCAGTTTTTGTCCATCAGAAGAGGA  
CTTTGGGGTAGACATTTCTTCTCCTCCCTTCCAGGTCCTTAATAACCTTTGATGCAAGAGTAGCCTTGGCAT  
GAAGATTGGCAAAGGAATGCTCTGCAACTTTCTTCACTGATGAATACAACCTGGGACATTTTTGAGGGGGTA  
GAACTGGTAGTTCTTCAAATCCATTTAGGGACGATTTCAAGTAGGTTTTCTTGAATAATATACAAGAGGA  
GAGGATGTTCTCAGTACTTGAATGTCTTGAGAATGATGTCTGTGGTGTGCTGGTGGAGCTCTATTTATACCCG  
ATTTGAGGGGGGAGCGGGAGGGGACATTTTTTATTAATGATGGTGACAAGGTGCGAGAATGCGTGTGTG  
TGTTTACTTCTGGACACCTTTCAGGCAAGAAATTTACTCTTCTCCATCTCAA

>Unigene33547\_All pri-miR(wssv-m3) size 1705

GGTCCACCCTCTAAACTCGAGTGACGCAGAAAAATTTTGA AAAATTTTGTATGAAGAGATTGAGTAAAATT  
TCTTGACGATAAGAGGAGGCAGTAGGTGAGGCTGCTTGT TTTGATGTGTGTCAGCCACATCTGCGTCATACATTA  
TATTTCCAAGAATTTTGTGACGTCAATGGACCATAAAAGGCTTTGTACGTCCAGAGACAAGTTTTAGTCTGA  
TAGATTTCTTAAAAAAAAGAGGGTGGGAGGTTTGT TTTTGTGGGTTCTGTGTGTGTATAAAAGATAGGTGC  
AAAGGTAGAGAATCATCATATGGACAAAATCTGTCCATGAGACCTCAGTAGAGAACGCACCATGGTTGCTTC  
AACTCCGTGTCCAGGCCAGGACCAGTTCCAACCCAAGAACTTCTTTCTACAAACTTTCTTGAAGCTCACAA  
GCTTGTGCTGGAACCTTCTTCTCCCGTCTACAGTAGTGATGTAGTTTATTGTGACTCTGAGACGTACACCAAA  
CCTATACCGATTTTGGGAACAAGAGTATAGTTTCTACCATTGGAGACTATGTCTTATCAAACCCCAATGAAG  
ATGTGAGTTACCAAATGGTTTCTCCGCTTAGAAAAATTTCCCTTGTCTATTCCACTGCACTTATAAGACGAAT  
GAAGAAGATAAAGGTATTCTCTGTGGAAGAAGTTGTACAACAAAAGAAAATTCAAACCTCAACTCATTG  
TTGGTTCATAACAACAAGAACTGGACTCCTGTTCCAGCTATCCCGTTTGACAGGGAGAATATATGTGATGCTT  
CAGGAAGGAGTGTTCTTATGAGTGAAATAATGTCCACGTCAACTTTTCAGACAATTTGCAAAAACAACACAC  
ATTACTGTTTGATATGTTAAATATGGAACGTGGCAAACAAGGAGGGAGTTTTCTCACTTCTTTGCATCTAG  
GAAGAATTCTTTACTA ACTTTGAAAATGAAGAAATGGACTCTCATGTGCTCAGTAACATAGCGAAATTCATA  
TGCAATGAAAAGGAAAACTAGACTCTTTCATACCTGCCAACGGAAAAATACCATGCCCTGATAAACTAAT  
GATGAAGGGTACATCCCGCTGGAATAGCAATTATGGAAGACAATTACCCTGCATTGCTATATCTCGTTTGT  
GGTATGGAGCATCTGGGCAAACACATACGGGGATCATAATGAATCTCTCAAAGCGTTTGCAATAAGAAATG  
ATGCAAAAGATTGTCTGGAAATTATAGAGTTTATAAGTGATCACTACAGTTTCAACAAAAATGTGACGAAGG  
AAGAATTTGTTAAAGAGAAGACTGTAGAATGTGTTGGATGTTTATATGATATTGAAGACGAGAAACGTTGTT  
ACAACTCCCATGTGGACATTTTATGCATACATTTTGTCTGCTAATAAGTGTCTAAAGCTAACTTTAGATGT  
GTTAAATGTTTCCAAACCTTTGATGACACAATTTT TAGAAAATGTCCCCAACTATACAATGGAAAATGGGTAT  
AAACCAAACGACTAACCATAAAGGAAATGGATTTGTTCAATCGTGCAATTTGACACATATTTAGATTTATTTGCT  
CATATAACGTCAAATTAGACAAAAAATCAAACCTAAACACAAACCTGAAAACAAAAAGGTGGAAGAAGAA  
CTAGCAAAAAGGACAGCAGAAATTGAAGAGGCCAT

>Unigene39470\_All pri-miR(wssv-m5) size 2926

ATATAAACATTAGTTTATTGGTATCTTATTTACACAATATACAGAAAATGTCACATATCAACCAATCAATCAGTC  
ATCCATGTCGTTGCGAACCCCTTCCCTGCACTTGGGAACATCAGATGAAGCGTCTCTGCAAAACATGTAGTGA  
TATGCGAGCATGGATGTACATGACCTCCTTACGATACATCTATTACAATATTGTCCATGTCTAATTACAGTCTTC  
GCCCATTTGCACATGGCAGTACATACATCCATATTACAAAAGAAAGCGTGGGAAATGTTACTACAGAATTTGG  
GGACTGTTCTCTACGCTTTGCAAGAGAGAAGGATCCCTTGAACCACTCCTGGACAACATTACAAGTCTGTC  
CCTTGTATATGATGGAACAAGAGGGGATAGATATTTGGCCATATACTCATAAAATGGATGAAAGACTTTATCC  
TCTTCGTAATTGTAAGAATTGGGAATACTGGATCATCTTCGTACATTCTAAGGGGAACGTGGGAGGGGACA  
AATCCATTAGGCACTACTACATTCGCACCTCCTGTGAAGCAGGTAGGAATTGGGGTGTAGACAGGGGAGA  
TGTTCCCTGTATTTGCACTCATTCTAGAATTTCCACCTCCTCTGGAAGGCGAATAAAGCCACATCATGTCCAATT  
CTGGTACATCATTGTTAAAGGAGTAATTACCAATCTTGGGGGAGGGTTGGGAAGTGGGTTGGTATTCACAC  
CCACTGATGAAGTCTCTATGGGGTTGGTATTTGTTCCATTGATTGGAATTCTTGCATATCAGTATTTGTTCCC  
ATCGTTTGGAAATCTTGCACATCAGTGCTTGTCCCATATACTAGTGTGAGGCGTGAGACGCCTCTTCTACT  
GGCACTCCCATTGGTCTTTTGTCTCCCTCTTGTGGAACACTACAGTATCAAATTTCTCCTGTTGCATACT  
CTGACGCATCGCCATGTATTCTCCATCATCTTTATCAAAGCATAAGCAACTCCATTA ACTATCCAACAAAGG  
TTAGTATAGAATGTCATATCACTGCACAGTGTGTCTGCACGAGCAATCAGATTGGGGAAAAGCTTTGTTCAATA  
CTCTGAAACAAACATCCTTGGGACCTTGTATTTCATCTCCATGTTT CAGCCAAGAATCTTTGTTCCAAGTGAGC  
CAAAAATACACCTCCCTTTTACCGGGAGGGGCCATGCATACATTCTCGTGAATCCATTTCTCAAAGCCTTT  
CTCCCCTAAGGAATTGACATTTCTTGAACCTTTCTTATTATGCATGGCAGGTGTGGGAGGAGGAAATACAT



AGGAAGAAGTATACACATCTATGGATGGGGTGGGCAATTCAGCGCAAATTGAGGAGGGGCGACACCGCA  
CATATCGATACTAGGGTCAACTTTATAAAGGGAAATGTTTGGCCTTGTTTTATAATCTGCTGCGACAGGAGGT  
TCTCCTCTACATATAGGTGAGGGAGAGGATCTTTCATCATCTTTTTGAGTTTCTTAATTCCTTCCTTTTTTC  
TTTTCCATTTTTTTCAATTCAGCTTCAGAGATCCCGACAGGGATAGAAGAAGAGGGCGCAATAGACGGTGCT  
GATGCTGCTGCTGCTCCTTCTTCGTCACATTCATCCGAATCAGTATCCATGATGGATCGAGGAGTAGGAAGTG  
GTGTTGTTGTAGAGGGAGGAGGGAAAGGGGCGAGTAGAAGTTGATGGCATGTTATCTGAATCACCAAACATA  
TCAAAGTTTGATCCAAAACATTCTTCTCCTTGTATCGTCCTCATCGTTATCACTAAAAGATACAGTTTCC  
ATGTACGAAAAAATGGGGGGACGGTTTCGAGACTTCTTGCTTGACATCTTTTTCGTCTTCTTCGTCATCATCAT  
CGTCATCATCCCACAAAGACGATGGAGAGGTGCTCGAGGACATAGATGGAGGGGGTGTGGGGTAGTAATT  
GTATTGGTGGCATTGTTGTTGAAATGAATCAGAAAATTGATAGTCAGAAGTGAATGGGGAGGAAGTATAGA  
GAGGAGAAGGAGCATAAGGGCGATAGGGGATTGGTGAGGGAGAGCAGTAGAGAATTTGTGTTGTTTTT  
TGTATTGCTGTGGTTTTAGAAAGACTCCCGAATCAGAAAATTTGAGCGGAAGTTGATGAGTCGACTTCTTGT  
CAGAGGGGAGGCTTGAAGGGTTGATGACGTCATCAGAGACTGGAGAGAAGTTTGCAGACACTCCCATTTC  
TTCGTCCTCACTCTTCATAAGGGCGAACATCTGCCTCTCAGTCACGGGGCGTTGGGGCATACTTGCACACAA  
GGCAGAGTAGTTAAAATCGTCTCCTTGGAACTCCATGGCTTAACTTCTCTCATCACAATGTTGGTGGTGAAG  
CGGGTCTTCTGGCAAAGCTCACCAGTGCCTTCAACCTTCGCACCAACACAAGCAGCCGGGGACGAAG  
TTTGGGCGCCTTCGGGAGATAGAGGTCCGGACATCACCTTATCCAAGAGATCGGCTGCAGCGTTCAGGTGA  
GGCGGGGCCATTGTGAAACATCCATAGTCTCCGACTGGTTGGAGATTCTGTCAAAGAGTAAAGGAATTG  
GACTTAGAATATTTTTCACTTCAACCAACAAAATATTACGCATAACATAGAAAATTTCAAAGTCCAAAGTGAT  
AGTGAGAACTTGTGCTTACCTTGTATGAATTGGAAGATCTTCTCGTGCTCCTCGAATAGATGGAGCAAGTGTT  
TCTTCATATCAGACCGCGAGAGCTAGTCGAGACGTATGAAGTTAGTTTCTTTAGTTCTCAGAACTAAGTAA  
CTTAGAGTCCAACCTTGGTGTAAAGACTTGGTGC GGCGGGGGCTGGAGAGGCCATTCTGTAGCTTGAGTAT  
TGGCAGGTCTCTTCTAGGTAGAAG

>Unigene33544\_All pri-miR(wssv-m6) size 7910

TGAATAAAAATACAAGTAATTTTATACCATCTTTTATTTTTCTAATCCTTTGAAATGTATCTTGTTACCTGACTCA  
TTACAAATTTCTCATCATCCCTAAAGAATGTGTACAAATCATATTAGCAAATGTACAAATAAAGTTAGTCAAA  
AACACACAAATATTAATCTTCATGTTGTAAGGAATGTTGGACACAACAGTACCCAGAACACTGTTTCATGATCA  
TGCTGTTACTCTGCAACAATTCCTTACTTTCAATAGCTCCGGCCACCCTCTTAATTACCAACCAGAATCCTG  
TTAAGGCGATCAACGTAATCGGAAAAGGAGAGGTCAAATCTTTGGGGATTCTTACTCTTAAGAATGACG  
CTCAGTTTTTCGTCGCTATCGTCCTTATATTTCTCCACAACATTCTGCATCTCCTTAAAATGATAGAGGTGGTCA  
ACCAACATCTTGCGCACAGGCTGATTAATTGCATCGATAACAATTTAGTAGTGATGCTCTTTATGCGTTCAAT  
GGGAAGAAGGCTCTTGAACCTGCTGTCTTGAGCGATCCCAAACATTGAAAAAATTCAGCAATAGCTTCAG  
GGGACTTTTTCTCAACTTCTTGCTTGACCTTCTCATCAGGAACAGTGGGGTCGCTCCGCTCCAGATCCTTCAC  
GAATTCTAGAAGTTGTTCTTCTTGGTCTTGGTGTGTTTATTGGATTGCTCTTCTTCTTAGAAGATGTGGATG  
AACTCTTGTCTTCAAACTGGGTGGTTCCGATTTAGATTTCTTTGTGAAAGTTGTTGCCTTTCTCCTCCACT  
TCCTCCTCAAAACACCTCTTGTAGTTCCCATCTTTGATGTCTGAGCCATTTTTATTATGACACAAACCTATTCC  
ACAAAAGATAGTTTTCTTAATTTACGGAGAAATTTAGTTGAACACGATCTCTGCGCACTTAGAGTACGTAC  
AAGATCTAAAATGAGAACATACACAGGTCCGGTGAGATTGCTACTGCATCTAGACAATCTATCCTCGTATCG  
TTTACACCAAATTTTTCACTGCATTGGCTCTTTCGCTTAAAATTTCTCAAATGAGCCAGGACTTTTCGAA  
TGAAGAACCGTATTTTCTAAGTAGAGGGTTAAACATGTACCATATAGACCATGGTATTGTGTTGAATGGGGA  
ATGGTAGGGAAGTTAAATATACAGTTCATGAATCTGGAGGCATTACCTTAAACATGAAACAGAGCCCGAAT  
AGTGTTCCTCAGCAGAACGGCGTACCAATTTTATGGGCTGTCTGGGGTTTCCAGACATGGAAGATAGCTTA  
TTCTGAACAAACAATTTGAATTGGTATTGATGCATCTTCTTAAAGCTAACGTAATAAGGAACTCTACGA  
ATGCCCTCTCCTAGTATCGGACATGAGTGCCTCAAACATACAACCTGCAGCCTTTCGAGTTTTTCAATCTC

GCTCATAAAGGTTAGCTGTGTTGCAGGACGACAATAAGATTTTCCAACAGAAGCGTATATATCATTAAGTCTGCT  
GTTTTAACTACACTTGCCTCTCTGGACACAATAGTGTCAACTGAACAAGGGTTAGGTGTAGAATCTGGTAATT  
TGATCACATTTTTCTACCATATTTGCCCAATCTATTGATGACTTTATATCCATATTATTTCGCAACACCATTAACAAA  
AGCGTCGAATCTTGAGACCTAGCAGAGTCGACCTTTGAAAAAATGCTCTCCATCCGCTTAGTCACATTGGC  
AATGACAGTGGGGTTTTGAAAATCTGTTAGAGAAAGAGGTTTCGGAAGAAATAGATGTGTCCATTGTATAATA  
TCCACAAACAATGCTAGGCGTTTTGTTATTTCATGATGCCTATATGCACCTATTTTCTTCCGAGCGGGCTATA  
TTGCTGTACGCACCGGACAAACTCCCTGTAATATCTTCCATGATGTTCTAATTCATCAGCTGCCTGGTCGG  
CTCTCTTGCGATTATTTTCTTGTCCAACGCGAGCAACAGACATTTTCAATAGGACATTATCCGATAGATATTTG  
TCGTTTAAAGATGTTCTTTCTCCAGTGATGATAGAGGCCACAGCCGAAGCTGAAGGTTTTGGAGGTGCTCCA  
TAGAGAGCAACAGAAAGAGCCGACGCTCCTCAGGTGATTGGATTTCTCCCTTGATTTTCTCAAATGAGTCA  
GCTACATCCAGAACGGCTGAAGCAGTCTTCTGAGGTATTCGTCCAATATTAAGATGCAGACATTTTCCCGG  
ATCTTTTTTATCAAATTACGTGTAAGTCTTGAATGCGATTTAGGAGATTCACATAGGGCCAGTTTACACCA  
AATGAATTGGATGGTAGATTTTCAGCTTGATTTATATCTCTCTCGACAATGAGAGACGGTTCGTGTGAACCCC  
TAAAAGTTAATGCCGCTTTTACAAGTTCAGTACAGGGCGACACAAGAAACCTTTATTATCTGGACTATAAAT  
TGCCCTCAAGTTTGGATTTGTGATTTACACACAGCTTCTGCCTTTTTAAAATGAAGTACAGGATCAGTTAGA  
AATTCAGGTCTTCCAGTCTTTTCCATTTGTGCTAGTCTATAACATACCTGTATGTTTTGTGCTTACACGCAGGC  
CCTGTTAAATATTCCGAGTAAAGACATGCACAAGTAGCCACGTACTCTCCAGAATCAGGGTGCCTAAAAATG  
GATTCTGCCCTCCCTGCATTCATACTTTTATTGCATAAATCTTACGCGTAGATACATCATGTTGCCTACTCAAA  
ACCTGAGGAGATGTAGTTTCTTCCAGGAAAAGTTCCTTAAGGGCTAATTCTCTCAATTCGTTTCTTGACAAA  
GGATATATTTTTTCTGGATAAACCCCTCTAGCCCTCAGGGGCATAGGGTCATGTGTGCCCGTTAAAACATCCA  
CAATTTCACTAACGCTAAGAGATTGATCCTTTTTTTCGCATCTTCTTCTTTATTGTCTCTTCCGGTGCCAG  
CCTCCTGTGTTATATCCAATATCCATTTCTTGCCTTTTTCATATTTAACTTTATCAATTTGTAAGATAGAGTCC  
AACTTCTCAGTAGGTGCTCTCTCAATGATGAGGCCATCCGTTTATCTAAACCCTGGGCAAGAGTGTCCACAT  
TATCCAGTTTCCCTATGCTTAGATGCATCGTGTGCTAGTACGCGGCTCGCTTATTCACAAACAAATCTCCTCCAT  
TGTGATTGATAAACCAAAAAATGATTCAGGGAGTCTTCTCCTCAATTTTGGATTTTTCTTGATGATACCTATA  
ATGTGGCCAAGATCATTGGCTGCTCTTTCTAGAGAAGACGCACTATAAACACTCCTGGCACATCTTCCCGACT  
GTTGGTTACAAGAGAATTTGTAACCTCCTTTCCGTCACAGAGTACGTGTTCTCGCAAGCAGCGCCACAAT  
CTCTGTCCGTCTCACAGGTACATCAAACACCTACAATCTGTCTTTGATACCACCCAGTCATGGAAGGCATTC  
TTAGACAAATCAGTCGAAGACATTATTGTCTTTGTTCTCCTTTCCACAAGTTGACAGAGAATTGATAGTCCC  
TTTTACTACCAATAATCTTGTGAATATCTGTGCTTCAAGTTTCAAGTGGCTCCTGTTTCTTGATAGCAGAAAC  
TAATAGTTTATTCAAATGGTTTTATTTGAGTAGCTGAATGTAAGGAGGTTCTATAGTTGGCTGTGGGACGA  
TCTTCCATCCCTCTCCTGCTTGTAAAGGATGCAAGAATATCACACATTTTAAACACTAAGCCCACCTTTGGAGC  
ACCTGTTGTTTCGTGAGTGAATTTGTACACATAATCTATAAATCACTAGGGGTGCATCTATTGTTCTTGTAG  
ACGTCTGAGAAGAAGAAGAAGAAGGAGATGAAGAGGAGGATAAAGAATCTACCAATTCCTGCTTCACTGG  
CGGATGGGTTGCAGCTGCTTTAAAACGTTAATCTTCTTGTCTCTGTTAATGTCAGATAATGCATTCTCTATGT  
AACTGGTACTATTTGATCGCAACTGTACAAATACCTTTATGATTTTCACTACTACCCTTGTTCAAATTGACAC  
CACACGCTTGCACAGAAAAGAGCTCTTTTCTTGTCCGATTCGAGAAAATTTACGTTTTCTATTGTTACCTTT  
ATTAGCAGTTTCTGGTTATTATAATGGATTTTTCAAATAGAGTACTAAAGTATGCATTTCCAGGTGTTTTATA  
TGACTTTTCACTTGAAGGGCCCTTTGTTGTATGTTAGAGCATGTCCACGGGATTTAGGCAAGTTTGTG  
ATTAATGTAATAAACTATATACATCATTACCAATAAATTTGGCAAAATCAGGTGCAATGTCTGTTGAGATGTA  
ATTATTCAAAATCGGTACGACGCCATCATCGTGTTCACCTGGCTAAAGTTACACGGTGTTTTTCTGTAGTT  
TTGCATTCCTCTTCCGCTACTTGAACCCGACAAATAGTTACTATTATTGTTAATACTCATTTTGTACCATTTT  
TTGATTACAGGCTCTCGCTAATAAAACATAAGGCGTTGGATTTTTTCTTCTGGTGCTTCCCTCAAAAATGGG  
GAGGCAATAAAACCCTTTGATTCACATTCCTCCACTATTTCTTGTACACAAATCCACAATATGATCAAGTTTA

TCCTTGATTGTTTTTCATCTAGCCACCATTTCCCTTGACAAGAAATGCGACTATTCATCATACTGTTTGTATTTT  
CAGAAACAGACTAAACGTGCAACAGAAAACGGGTCACATCTCTTTACCGTAATATTGGTCATTTTTATT  
CCACCACCTGTCTTGGTTTATAGGATCGAAAAGAAAGTGTGTCTATAGCACGTCGAGTAGTTTCTTTTGAAGGT  
TTACACAAATGTCCAAAAGTTGTTGTGATCTATTTTTTAAATGAAGGAGATACTCTTCTTTTGAAGGCAC  
TAAATTTGCAGACATGGCAGCGTCCATACTGTTCTTTGTTCCATAGTATGTCCTATCCACTTCAGAAATATGTTG  
TTGGTCCACCATCGCCTTTTCACTTGCTCGGCCGATGGTTTGACGTACGGGTAGGAGTGGAGCAACATGTC  
AATGTACAAGTACCATTCTAGATGCGGGATGCCGATTTTTCTCTGACTCTTGTGCTTCTTTGGGGGACATTT  
TAATGTTGTTGTCCATAAAGTAATGGAATAAACCAATAGTAATTTGGATACGACAGAAACATCACCGCACCC  
ACTCTCTCCTTCTCCGAGCACAGTAATTTCCCAACTTAAATGTTAATGCAGTTTTATCCTCAACCAGTCAG  
ACATTTAAAATTGGGATCCTTACTATCGCGCATCATTGCAACCTTTGTGTAGTATCCCCTATAGTCTCTCCAG  
GCAAGAGAGGCTTTGCGGGCACTCGCAGCTTGAAAAACATACCGGGGAACGTTTCTGGGTATAACTGTAA  
GAGATGCAATTTCTTTGAAGAATTTCCCGAGTCGAATAAAGTTCAAGTGAATCTATAAAAGTGGACT  
GTATCACTATAGACACGTTAGCCACACTGATGTTTTCTGTAGAATATCAGCAATATCAGTCGTGGCTTAAATC  
ACACACAATTTGTAAGCGAAGGATCTTGAAGCCCGACAACACTACTGATCCAGTTTCAAATATCAAACAC  
TGAAGAAAGATTCCCTGTTCTTCAATGCAGTGAAGTCTTCTGGGACGTGTCTCGCTTAGAAAGCACCATTC  
TAGCTCTGTTGATGACCATTGATTTTCTTCACTTTCTGATAGCATAGCCTTTTCTACCGCAGCAGCAGTGGCA  
GCGGCAGCTGCGGCCGATGGCGTTTTCTCGGTGGCACCTTTTTTGTCTGTAGACCTTTTATTGTCTGTT  
CGAATTCCTGGTGGCGTATATGTTCTCGTCACTATTTCTTTGTTTCAGGTGCATCTTCTTCTTTATTTTCTT  
TGCTGTTTTCTTACCCAATTTCTTGTCAATAACTGAATGTTTTGGTCTGTGATATTGCCTTGAATCGATGTC  
TAGACTGACACAATTATTGTGAGTAGTACAGAAAGTGTAGTCGACATTTCTTAGGATAACATGCCTAGAACGG  
CCTTTTGAACAAGCACACCATGTCTCGTCACTCGACGTCTGGTCCACTACTGAATGAACAGATGCGTAAG  
AGTTTTGTTTTATAGCCTCCCTGAAACACAATTAATGAACTGAAAACCACTACAAAAGTAAGATGGAAAATCC  
CGCTGAAGGAATGGGAGAAAGTATTTTCGATGCTGTAAGTCTGGCAACAATAATCCTAAAAGTCAAATC  
CAGAAACAAGAAGTATTGCGGGAACCAAGAATATGCGGAAAGATTTCTTCAACCTTTCTCCAGTGTGCG  
GATGATAGATTTTCACTTTTCTGGTGACATTATAGATAAACATTACTGTCATTCTGTAAACGTGCCAGATGTTG  
TGCCTAATAACAATTTGCAGTTTTCTTACCTGAAGAGGACCGTGCCAATAACCCCGGGCTATACGATTCTATT  
GAAGGAGTATGTATAACAGTCGAACAAGGTGAATTATGCATCATCAACAAGTCAAGCGTTCACGAGTTCAAT  
ATTCTGGTGTCTTGCATAAGGACTTATTTGGTGAAGATATCTGGATGGAATAGAAACTGCATCAAGGGAA  
GAATCTCGGTCTATCCACCTATATCTGGAGGCTGGGCAGAGTATCAGAACCCCAATCCAAGACCAGAAGGG  
ACAATACTGTGAACTACACTATCGTTTTTTCTAACCAAGTGACGGTATAAAAGGACGAAGCAGGGCCCCAG  
AGCATCATATCTCGTCTGGTAGTCGAGGAAGAAACATCTCTCGAGATGGACAATCTTATACCAACGACAAC  
ATTATCCTCGTCACTTTCTGAGTGGATTGGCAGTCGGCTGCTCCATGACTATTGGGCTCGCACTGGCCATGA  
ACATGCTCGTGAAGTGCATCGACAGAACTACTACTTGCAATTTCTTGCTCACCGTGGGAGAAGAATAAGAATA  
AGAAGAACAGGAACGGGAGCAACACCGAATCCAGTTTCATCAGCCACGTCCGGTTCAACTCCAGATAAG  
GACCTGGACATCTCTGAACCCATGCTCAAATCTACCACTTACGATCTGGCCAATGTTACCCCTCAAGTACAA  
AACTGGTAACATTTTCTGGTCCAACCTATGCTAGTCCGCCTACACCCAGGCCAGTTGCCAATACACCTCAACA  
ACAACCAACAAGTACAAATAAAGAGGAAGAAAGTGTCTATATGCCAATGTCGAGTGTCTCGTCTGTCATTTTC  
TTCTGACAATAGTCTTCTCTGCAACACCGCCCATCTCCACCTAGAAGCAATGGCGGTGATTACGTGTCA  
TATGTAAACGGACGACATCTGAAGCTTCTTCAAACCCACCTTCTCCATCTTCAATATCAAGAATGAGGAGG  
GAGAGGATGATAATGTGGAAGAACATGTCTACGAATACGTGCCAGAAGTACCTCAACAATCTCCATCTATCCA  
GAAGTGTATCCAGGAATTGAAGGAGATGAAACACAAGAAAACACCCTAACCGAGCAGTAGTAACAAC  
AACAACAATGCTCCACGTATAACCCAAGTTACGTTTAAAGAAATCCCACCTAACAAATAACATGTGGGAGA  
ATCATGTGTATGAAACACTACAATTGTGTCTTCCACACCTTCTCCTACCTTTATTCCTTCACTAAAAGTATCA  
TAAGGAAATTGTCATTTAAGAGGAAACAATAAAATATTATACTTTTAGGTGAAGGAATAAAG

>Unigene33511\_All pri-miR(wssv-m7) size 1896

AGGCATGCAAAGAAATTAAGTTTATTGTCCATTATATTCAACAAACTTTAATTTCTTTGCATGCCTTGTTCAA  
AAGGGCAACATAATCGCCTTCTTTCTCCTCCCTCTTTCTTTGTTCCCTCCACTGCTTGTGGCTACTTCTTCTTC  
TTCCCCACGTTCTCGTTGTACGTCTCAATTGCCTAACTGTGTTGAAAATCATGCGACGCTCTCGGCGCAGA  
CGCTTCTTTCTCCTCTGGTAATGTTTCTCCTTTTTTATTATGCCTTGCCTTCTTTAGAAAGAGGGGTCAATC  
ACTTTTATTTCTACACCATCTTGATATACTTTCCATTATCCATGAAGATTTTGATGTCTGATCCAGTAACCTCTC  
TGACCATCTCCATCAACAACCTTTCATTGGGAGGATCGATGAATGATTTTATTACCCTTTCCGGATGCAATG  
AAATGGTTATTAATAATGGTTTTCGTATACTATCTCTGATGCATATAGGTGCATCTGAGCCAGTTATGGACATGAC  
CAATCTGGGCCTACGTTTCATCCACGTCCTCTTTCTGTAGTCGTCCGAAGAGACGATCTGATTCCTTCTTCTG  
TGCCAGAGTAAAAGGAACCATTTCCATTGGTTCTGCACAACAAGGAGAAAATCTCGGTGAGAAAAGGCAAAA  
GACCAGACAGGCCACCGCTCATATCTGGATGATGCAATTGAGGACTTTTTATGCACATCTCGAAGAGAAAAT  
CCTTTGTTCTTCTGAGGCAGCATATAGCTTTTTGGATTCTTTAAGTTTTTCTTCCAGAACAATTCTTTGCTAA  
CTAGAAGTTGACTTCATTTTTTGCAAATCTGATTTCTTTTCGAAATTATCTAATTTTTGATTACTCTTTTCTA  
GCGTGATACAACCTGCAGCATTGAAAAGGCATGACATGTAATTTCCAATGCTTTTAGCTGACGGGTGTGTGCT  
GTTGTAGAAAAGTAATCCAAGTTTATCCATTGGTACAATTAGGCACATATTTGAAAACTGCCAACTATGGGG  
TTTGCGATACTTAAGCCATTGTACGTTAACCTATCACAGATATCATACTGATACACGAGAAGAGGTACCACC  
GTGTTGCACTAACACTTGTTCATATTCTTAAGAGTACGGGTACAATTTCTAGGAGAAAACCCACACCCTACT  
AAGAAGTCTGTTGTGATTATCATATAATCACATTTCTTAACGGCCGCATTTGAAAGACGTTTCATGTATGATTCT  
GTATAGGGGTGAAAATTTAAAGTTCTTGTCTTAATACTAGAGCCTTTTCTTCCACAATTTGTTTCATTTCTGGA  
ATGGGCTTGGTAGTGATTTCGTTCCATTTTTTTCCATAATTAGGGTCTTCATCTTCTAAGAAACTACCTGTTTT  
GGGAGACTGGATGTGATTTTAGTCCAATCTGAAGCGTAGGATCTCCTGTTAATTGTCTCAATCTTTGTTACC  
GTTCTTGATGTGGAGTACTTCTTGTCTTAAGACGAACTATAAAAATGTCCTTCTTTAGCTCACTTCTCCTGA  
CACTCTTGACTGATTTGAATGTTAATAGTACCCGTTCAATTTTTCGGTATTTTCCCCAGACAAACAAATACCAT  
TTTTACTTTTAATTGTTTAAAGTCTTCCATTTTTTATACCGTGAACCCTAACAATGGTGTGCCAGTATAATAAT  
CTACGGACCATGCTCTTGATCTGGGAAGTGTACTCGTGATTTCTGTAGAAATTGCTATTTCTATTTCATTTTCTC  
CCATTACAGGAAAAGATGATAAAATGAAGACGTGCGATGAGATATGTGTTTTTTCAATATCGTATATCAAATTT  
GGGCAAATTACATATTTTTTAGCGTCAACACTCATCTTCATGCAAGA

>Unigene33576\_All pri-miR(wssv-m1) size 2319

CACTCTTTTAAACTGAACGCCAAAACCTATTATCGATTAGAGGAATAGTTTTGGACACGTTATCAATATCATT  
ACAGCACTGAGCATTCTGGAGATGCTGGTTTCGATTGTTTCGATTTTCCAGTACTTTCCGCTATTGATATTACG  
TTTCTTCTTTGGGGTTTCGTTTGTGGTTGCTCTCCTCTCATCATCTTCACTATCCGAAGCTGAAGAAGAA  
GATGAGGAAGAAGGAAGGGGTCTCTTGACACCTCTAGGGGCAACTTCTGCTCCCTCCACAACACCTTCAAC  
AGTAGTTTCCAGAATCATTCTTCTTGGGTATTATTCTCAACAAGAGACATGTTGTTGGTTCTGGGGTTGGTT  
GGTTCAGTTGGGATATTGAATGATAGACGGGTGGATTTTTAGATACTTTCCATTGACCATACTGACACTTTGT  
TATAATTTGGGTACAAGGGGACTCTTACATCTTGACCGTGAACGACCCAAAACCACAAACGCTTAAAGTTT  
AAAAACGACCACATAATACTACATTTTTATATGAAAATTGGCACTTTAAGTTCTGAAGCTAGACATCTCAGAA  
AGTTTATCCATCATACTCTTGTCTGTTTATCGTGTATTATGCCAGTTATATTAGATCCATATCCTAATGTCCG  
GCCGCATTACTGGGTGTAGTAGTAGTATTTTTGTCTTCTGGAGATATCATGTTAATATCCAATCTCTCTT  
CATACTTCCACATGATCCTTTGTCTGTTTCAGTTCTGATCCTAATACTCCTCCTCCTTCTCTTGTCTGTTCC  
AGAAATGCTGAATGTGTTGGTTGTTGTTGCTGCAACATCAGGGACGATCTGTCTCCTCGTCTGCTGCTATGAC  
TGTTATTTGCAGTGTAAATACTCATAAAATGGTTGTTGGCGAGCTTTGACATGTCGGCGGCTGCACTCAC  
GGCGATGGTCGTACACAGGTGAGTAGTATTACGTATCATTCCAATTGATTTGTTATATTAATAGCATTGTAGA  
TTTTGATGTTGCTTGATAATTTGCTGCTCTCATTTCAGATTCCGCTGCTTCTGCTTCCATGAGCTTGATTGATGC  
TGCGCCTATAACAGCTACCCCATGGCGTTTGTAGCTGGGAATGCACAACACTTGTAGGCTTATTTGTAACC

TGTTTCGACGAGTGCTCTTTCTGCTCTATTTTTATATAAATCTTGTGTATTTTTATCATTGTTGAATTTTTTCAAGT  
ATCGATTTGATACATCTTTTCATTGTATATTTTGCTAGAGGGGTGGGTTACAGTCACTGCCATTTTTTCAAAC  
ATGTAAGAAAGAGCACCGTCTACAAAAGATCCTCCTTCTAATACATTAGAAGGGTTCATATTCGCATTATTTGT  
TAAGGCTTCAGACATTGATTTTTCCAGAGACTGAGCGGCAAATTAAGTCCATGTCCATAGTATTTGAGTCC  
ACTAGTAAAGTGTACGCTTTAACTCCTCCTTCATCAAATTCCTCGAGCGTACGACCCCGATACATCCTTCTGC  
GATGGAATAAAATCCTCGTGCCAGATTTGACATTGTAGTCATATCCTGTAATTTATAGATGAAGGATCGTTTC  
CGGAAAAGATAGAAGTTTCTTTTGATGTTGGAGGAAAGAGTAGTATGGACATGGCTGCTGAGTTTTGTTGG  
TCCATCGTATTGTTTACGAGCGTGTGGCATTTTTTGATTATATTATTAGCTTGGGCACCTTGGGATATGTTTTTC  
AATAGGTTGGTTAGCCTTAGACCAGTTACAGTATTATCCCTACAGATTCTGGGAGGTTAGAAAATAGTATATT  
GGGCGAGATATTAGATCCGATAGATATAGCCGTTTTTATCTTGCCGCCAAATTTATGCGTCTTCCCATAGGCG  
AGTAGTTTTGCTTGAACGCGTCAGCCGTTAATTGTACTCTTATTGGAAGGGAATGAGTTCACATTGATTT  
TCCCATTCTAGAAATACTTCTCCACCCTCTTTCAAATCCGTTGTTGTTTCATGTTGAGGGCATTGTTGTT  
GTTGTTGTTGCTTTCGAACGGCATCACCGACATCATTTCTTCATTGAGGTAGAGACTTTGTTACTAATTGTT  
AAATTTTTAAAGAATGACTCTACAACAGTTTTAAGTCTCTATTTTCATTGAGGGTAAAAGTTTTGATGTTAG  
AATGAATGCTTCATGGCGATTAAGTACAGTATTATCCACCACCACGAAAAAGAGGCAGCTAGCCTTGCCAAT  
TCAGCTCCAGAAT

>Unigene39471\_All pri-miR(wssv-m11) size 2795

TACCGCTCCCCATTCCCTCTTCTTCCCTTCTCTCCCTCCCTCCCTCTCCTCCCCTTCTCCCCTCTCCTTG  
CTTTCTCTCCCCTTTCATTGCCTCCCCACCAATCTTGTCTTTTTCGCTACCTTTCCTTCCCCTCGCTGCTTCC  
TCTCAATCTTATTTCTTCTCTCCCTCTCTCCCTCCCTCTTCCCTTCTTTTCCCTATTTAACCTCCTCTCCTCT  
CTTCTCGCTCCCTTCCCTTCCCTCTCCCTCCTTCTTCTTCCATACTTCGTCCTTATCCCTATCCTCCTTCT  
TTCATTATCCTCCTTCCCCTTCTTCCCTTCCATCCTCTCCTCATCTCCCCTCCCTATCCCTCTTCCACCTC  
TCTTCTTCCCCTCGACCTGCTTCTCCTTCTCCTCGCATCTTTTCTCCCCCTCCCCCTTCTTATCTC  
CCCTACCATTTTTACCCTTCTTCCCTCGTCTCCCTCTTCCCCTCACATAACCGCATCCTTCTTCTCCTT  
CCTCTTCTCCACATTAGAAGGTACGAGGGGTGTTGTCGGGGCAGCAACAACAGATGTAGGCCTGAAGAAT  
TCTTCTCTGTTCTCTCACACACCTCATCATCGGAATCAATCTCAAATAACAGGGTCTTCTCGGCTGTACTCTA  
TTATCTTCTTTTCTTCTGCTGGATTACCTTGATGATGTTTTGTCCTCAATTTTTGAGACTCCCTTACGCCA  
TCCTTTGCTTGTACATCAATTCAATGATTGTGTCACCGTGAATATCATCACTAGAGGGGATGTTACCGTCAC  
AATATTGCAAATGGGAATGCACTCTGTCCCTTCCAGTTTATTGATTGATTAAGTCTGTGCGGAGAAGTT  
GTTTGGCGTATAACTCACTGTGCTTTTTGCACCCTTCTGTGTCATACTTGATAAACTGACAATTTTCGTATTCA  
GGCAGGTCCCAGTCATCAAACAAAGTCCCCGACTTCAATCCTGCGGCAACCTTTCGATACAGCCATAGGA  
GGCACAAGTTCTTCCACTTCCGGATGTTGGAATTGCTTTGCAAACATATACTTTGAATCCCCTTAGCGCACA  
CCTTTACAATGTCAATACCCATGAATGCCATCAAGTTAGCTGGGAGTCTAGGTTTCTTCCCATTCTGTTACCC  
CAGCTCTTGTCCAGATCAGGGTTAACATTATCGTGGAACAGAACTTTGACTTGTATTATAATAAACAGTCC  
CCTAATTGACGCTTCATACACGGCCCTGGCGGCTGAGGCATAGTTTGAAGGAGTGAGGATATAGTTACGGA  
AGCGTTAACGCCAGCAGTATCCCCCTTACAACTTATCCCATGCAGTCAAAAATCCCTTGCAAACATTGA  
ACGGTCATATTTGGAGGGGTTAATCTCAGAGATGAACACATTAAAGGTATGAATTTCTAGGGGGGTAAGGG  
CAGTTTTACGGCACATTTTACTCAAATCTTCATCTACATTTACCTTCTTTAGGGATGGTGCTTACTTGTA  
GAGTTTCAACTTGGGGAAAAACAAAGTCATCAAATTAACATCAACAGGGGCACCGCAAACATGCCATGA  
TTGTCCCCATCTACATTATTAAGGGATTTTTGGCTGTGGCTGTAACCTTCTTTGATCTTCCGCCGCCACTGTT  
ATTACTACCACCAACACGCTTGTACTGATGTTGTTACTATTATTAGAGGTCGAGGGTTGTTGTTGTTGTTAA  
CAACAGTTGATGGGACACTATTATTACTTGGAGCCACATCAAGTATCCAAAAACAACATGTCCAAACAA  
CTGGTTAAGTACGTTACATTAGACACTTTAGTCACCAAAAACCTTGAACACTTGGATTATAAACAGGGTGCA  
AACTAAGACTGCTCCTAGAGACAGGGGAAGTATTACTATTAGAGCCACTACCACACTCTTCAAGCAAACCTCA

CACGTTTTGAAACATAACCAGAAATTTGAGCGGAAGTTGATGAGTCGACTTCTTGCCAGAGGGGAGGCTTG  
AAGGGTTGATGACGTCATCAGAGACTGGAGAGAAGTTTGCAGACACTCCCATTTCTTCGTCCTCACTCTCA  
TAAGGGCGAACATCTGCCTCTCAGTCACGGGGCGTTGGGGCATACTTGCACACAAGGCAGAGTAGTAAAA  
TCGTCTCCTTGAACTCCATGGCTTAACTTCTCTCATACAATGTTGGTGGTGAAGCGGGTCTTCTGGCAAA  
AGCTCACCAGTGCCTTCACAACCTTCGCACCAACACAAGCAGCCGGGGACGAAGTTTGGGCGCCTTCGGG  
AGATAGAGGTCCGGACATCACCTTATCCAAGAGATCGGCTGCAGCGTTCAGGTGAGGCGGGGCCATTGTGA  
AACATCCATAGTCTCCGACTGGTTGGAGATTTCTGTCAAAGAGTAAAGGAATTGGACTTAGAATATTTTCA  
CTTCAACCAACAAAATATTAGCATAACATAGAAAATTTCAAAGTCCAAAGTGATAGTGAGAACTTGTGCTT  
ACCTTGATGAATTGGAAGATCTTCTCGTGCTCCTCGAATAGATGGAGCAAGTGTTCATATCAGACCGG  
CGAGAGCTAGTCGAGACGTATGAAGTTAGTTCCCTTAGTTCCTCAGAATAAGTAACTTAGAGTCCAACCTTG  
GTGTAAGGACTTGGTGCGGCGGGGGCTGGAGAGGCCATTCTGTAGCTTGAGTATTGGCAGGTCTCTTCTA  
GGTAGAAG

>Unigene33576\_All size pri-miR(wssv-m12) 2319

CACTCTTTTTAACTGAACGCCAAAATATTATCGATTAGAGGAATAGTTTTGGACACGTTATCAATATCATT  
ACAGCACTGAGCATTCTGGAGATGCTGGTTGCGATTGTTCCAGTACTTCCGCTATTGATATTACG  
TTTCTCTTTGGGGTTTCGTTTGTGGTTGCTCTCCTCCTCATCATCTTCACTATCCGAAGCTGAAGAAGAA  
GATGAGGAAGAAGGAAGGGTCTCTTGACACCTTAGGGCAACTTCTGCTCCCTCCACAACACCTTCAAC  
AGTAGTTCCAGAATCATTCTTCTTGGGTATTATTCTCAACAAGAGACATGTTGTTGGTTCTGGGGTTGGTT  
GGTTCAGTTGGGATATTGAATGATAGACGGGTGGATTTTAGATACTTCCATTGACCATACTGACACTTTGT  
TATAATTTGGGTACAAGGGGACTCTTACATCTTGGACCGTGAACGACCCAAAACCACAAACGCTTAAAGTTT  
AAAAACGACCACATAATACTACATTTTATATGAAAATGGCACTTTAAGTTCTGAAGCTAGACATCTCAGAA  
AGTTTATCCATCATACTTTGTCGTCTGTTTATCGTGTTTATGCCAGTTATATTAGATCCATATCCTAATGTCCG  
GCCGGCATTACTGGGTGTAGTAGTAGTATTTTGTCTTCTGGAGATATCATGTTAATATCCAATCTCTCTT  
CATACTTCCACATGATCCTTTGCTGTTGAGTTCCTGATCCTAATACTCCTCCTCCTCCTCTTGTCTGTTCC  
AGAAATGCTGAATGTGTTGGTTGTTGTTGCTGCAACATCAGGGACGATCTGTCTCCTCGTCTGCTGCTATGAC  
TGTTATTTGCAGTGTTAATACACTCATAAAATGGTTGTTGGCGAGCTTTGACATGTCGGCGGGCTGCACTCAC  
GGCGATGGTCGTACACAGGTGAGTAGTATTACGTATCATTCCAATTGTATTGTTATATTAATAGCATTGTAGTA  
TTTTGATGTTGCTTGATAATTTGCTGCTCTCATTTCAGATTCCGCTGCTTCTGCTTCCATGAGCTTGATTGATGC  
TGCGCCTATAACAGCTACCCCATGGCGTTTGTAGCTGGGAATGCACAACACTTGTAGGCTTATTTGTAACC  
TGTTGACGAGTGCTCTTTCTGCTCTATTTTATATAAATCTGTGTATTTTATCATTGTTGAATTTTTCAAGT  
ATCGATTTGATACATCTTTCAATTGATATTTTGTAGAGGGGTGGGTTACAGTCACTGCCATTTTTTTCAAAC  
ATGTAAGAAAGAGCACCGTCTACAAAAGATCCTCCTTCTAATACATTAGAAGGGTTCATATTCGCATTATTTGT  
TAAGGCTTACAGACATTGATTTTTCCAGAGACTGAGCGGCAAAATTAAGTCCATGTCCATAGATTTGAGTCC  
ACTAGTAAAGTGTACGCTTAACTCCTCCTTTCATCAAATCCCTCGAGCGTACGACCCGATACATCCTTCTGC  
GATGGAATAAAATCCTCGTGCCAGATTGACATTGTAGTCATATCCTGTAATTTATAGATGAAGGATCGTTTC  
CGGGAAAGATAGAAGTTTCTTTGATGTTGGAGGAAAGAGTAGTATGGACATGGCTGCTGAGTTTTGTTGG  
TCCATCGTATTGTTACGAGCGTGTGGCATTGTTGATTATATTATTAGCTTGGGCACTTGGGATATGTTTTTC  
AATAGTTGGTTAGCCTTAGACCAGTTACAGTATTATCCCTACAGATTCTGGGAGGTTAGAAAATAGTATATT  
GGGCGAGATATTAGATCCGATAGATATAGCCGTTTTATCTTGGCCGCCAAATTTATGCGTCTTCCATAGGCG  
AGTAGTTTTGCTTGAACGCGTCAGCCGTTAATTGTACACTCTTATTGGAAGGGAATGAGTTCATATTGATTT  
TCCATTTCTAGAAATACTTCTCCACCCTCTTTCAAATCCGTTGTTGTTGTTGTTGTTGTTGTTGTTGTTGTT  
GTTGTTGTTGTTGTTGTTGTTGTTGTTGTTGTTGTTGTTGTTGTTGTTGTTGTTGTTGTTGTTGTTGTTGTTGTT  
AAATTTTTAAAGAATGACTCTACAACAGTTTTAAGTCTCTATTTTCATTGAGGGTAAAAGTTTTGATGTTAG  
AATGAATGCTTCATGGCGATTAACCTACAGTATTATCCACCACCACGAAAAAGAAGGCAGCTAGCCTTGCCAAT

TCAGCTCCAGAATCCACCATCATTGTAACCAC

>Unigene39453\_All pri-miR(wssv-m9) size 1045

CGGTGTGCTGGTACAGGAATATTTCTGCGGTAACCTTTCCATTCTTACATTGGGCAGTGACCTCCCCAAGA  
GTGTAGTTTTCTTCTCCAATATAGATTCACATGCTCCAGGGGAAAGCTTAAAAACATTCTTTGCCATGTGATCG  
ATGCTCATGGTTTTTATCCACCCTTTACCATTATTCTTGCATAACCTGTTCCAGTTCAAGAGAGGGCTAGTGTC  
TAAAACGGATAGGTTTTTACTACCAAACCCAACAGGCCACCAAGATGAAGGGGGTTGTTTAGTACGGTTGT  
TAGACCACAAAACTGGACGCTTTTCTTTGCGTCAATACAGCTCTGTTTTATGGTCTCGTAGTTGGACGA  
CACATCTTGCACGTCAGAAATGAGGCCTAATTTGCGGCCTGTCTAATCAAATGGAACGGAGATTCTAGACC  
GGCTGCAATATTGGTATCAGCCTCTGCCACTGCAAAGTAACACGGGGTTTTCTAGCTTGACCCACTTGTC  
AATGGAAGAAAAGTTCTCTTTACTACATTTGTTTCAGTCACGGTATCACAAGAAGATTTCAAGTGTGTTGGC  
CCCTTGACATGGGAACGGAGGACAGACAGTGGAGTATAGTCTCTAGCCTTCAAATTGACAGTAGAGAATTT  
TGCACAATTTGGATGAGAGAATCTTTTTCTGTACTGGGTGTCGGCATTGGCGCGGTGCTTCTCAACACAGA  
CGCGGCACTAACAGAAGGCAATTGCTGCTTCTTGATAATGTCTGTGCGATACGTTGGATTTAATGTTGCAAT  
TGATTTTCATCAATAGTAATAGGCCTCTTCTTCTTATTTCTATTAAGTTGTAAGGTGTGCTCTCGTAGTCCTCG  
CGGAGCCTCAAAGTCACAGGAGGCGGTGCTTTTCTCCACCTCTCCATTATTCTTCTTTAGTCTCTTCATGG  
GCCTAAGAGAATAAGGAGAATCTGAGGGAGGGGATCGGCGAGTAGCGTTTTTAGAGCAACAAGATTTAC  
AGCTATGGCTGAAGGTATCTTGAATTGCC

>Unigene37970\_All size pri-miR(wssv-m8) 1855

CAAGAGAAGAACGGCTAAAGACGTCAAAAATACGTTTAAACAAAGCTTTAGTGATATTGTTGAAGCCACA  
AACGAGCGTGTGATGCGTTGAAAGAGAACCAAGCATTAAATACAGAATATGACAAGAAGGATAATTACTTC  
CAGGTTTTAAAGTGCTCGATAACACCTTCTGTACCAACAGCTATTATAGGCGCACACGTGAAACAGGTGGCC  
AAAAGTAGCGAAATCGAACTGGCCGTGAACGAACCTCGATATAAAAAATAAGTGCTCTTTAGTGACAACGAA  
AATGAGTCGTTAAAATTTTTAGGGACCATGAGAACCTTATACTACAAATTGCCGTCCAGTTATTCTCTAGGC  
ACGATAACACCAAATGCGTGGGGCAGAAATATGTGTTAAAGGCAACGAAAAACAAGTTTGTAAACAAA  
CTGGTGGTAAAAAACTCCCAATGCACCATCCTCATCTTCACTGTGCTAGAAATTAGAGGGCGCTACCAGA  
AATTTACTGGAGAATAATTTCAACAAGGGAGAAAATAACACTGTCAATGAAAAACAAGGACATTCCTCCTTCA  
GAACGAGCCAACCTGGACACGACCAAGGCAGAAATATCGCACGTCTTTTCCACTCTACACAGACTGGACAC  
TAAAGGAAGCTTTTTCTTAAAGGCAACACTTTTTATCAACGAAAACCAACATTGATAATAAATTCAGGTGG  
ACAGAAGTTATAGGGTGGACAGAAAGTGAAGCATCAAAACAACCACTAAATCGCTAGACAAGCCAACGG  
ACGACAATTTATTCGTGCTACCCATTCTTTCAATAATTTGGCAGACCACTTACGTTTGAATTTAAAAACGTC  
CTCTATAAAAATAGTACCGCACATCCCGCAAACGAAATTAACAAGACTCAAGAGACGCTAATAAATCCCC  
AGATTGATTCGGCGAAAGAGTACAAGATGGTCTTTGCAGAAATCGACAAGTGTGTTGGATGTTCTTTTGGCCA  
TAGGGAAGAATGACAAATACACAAAAGCACTGTCATACAATATAGAGGAAAGTTTAGAAGGTATTTAATAT  
TCTGCTACGCCTTTTATGCTCTAAATAAGGCAAAACATTCTCGCGCAGTATCCCCTTACCATTTAATTTCTTTA  
ACCTTTTCTCCTTCATGTATTGTCATGGTCCGTTTTCTCCATTCCGCCAGTTTTTTGTCCACATTGACGTTCTGCT  
ATCAACACATGTTTTTCCCATGGGCACAGCCGCCCATCCGTCTCAGCCAAGCGGCTCATGGATATCGATTC  
CGCCCTAATGAAAGGAGGAAAGGGGGTGGGTGTGAGGGATTTGGTTCACCTTCAAAAACAAGTCTCCAT  
ACAAGAACATTGGTGTCTTTCTTAGGTTTTGCTGAAATGGCTATGGGAACAATGACGGCTCTCTTATCTGGTG  
TAGAAGTGCGTGTATCTCCAGCTCTCAACAAAGGATATCTAAATCCCTAGAAAGATGGTGTGATTGATCAT  
CTTTATATATTTACCTTTGTTTTATTCCACAGATTCAGTGGTGCGAAAAAAGTATCACTCGAATCGGCGCTTC  
GCCTCATCATGGGGCAGACGCACGCCACACAAAATAAGGTGAGGGCCGCAAGAGATGCCGAATAGAAGC  
AGCGGAAATGGAAGGTGTGGAAGAAGAAGAGGGCGGCCTGACACTCTTATGCCATCTATTGGGTCTTC  
CTTACTCTATAAAAAGCCCTCGGATTACCTGTCCCTAAGATAAACCTCTCATGACAGCATCTTCTTCTCAAT  
ACAATTTAGGGGATTTGTAGGCGTGGAACAACCTTCAAAGGCTAA

## References

- Aliyari, R., Wu, Q., Li, H.-W., Wang, X.-H., Li, F., Green, L.D., Han, C.S., Li, W.-X., and Ding, S.-W. (2008). Mechanism of Induction and Suppression of Antiviral Immunity Directed by Virus-Derived Small RNAs in *Drosophila*. *Cell Host & Microbe* 4, 387-397.
- Brackney, D.E., Beane, J.E., and Ebel, G.D. (2009). RNAi Targeting of West Nile Virus in Mosquito Midguts Promotes Virus Diversification. *Plos Pathogens* 5.
- Bronkhorst, A.W., van Cleef, K.W.R., Vodovar, N., Ince, I.A., Blanc, H., Vlak, J.M., Saleh, M.C., and van Rij, R.P. (2012). The DNA virus Invertebrate iridescent virus 6 is a target of the *Drosophila* RNAi machinery. *Proceedings of the National Academy of Sciences of the United States of America* 109, E3604-E3613.
- Chotkowski, H.L., Ciota, A.T., Jia, Y., Puig-Basagoiti, F., Kramer, L.D., Shi, P.Y., and Glaser, R.L. (2008). West Nile virus infection of *Drosophila melanogaster* induces a protective RNAi response. *Virology* 377, 197-206.
- Flynt, A., Liu, N., Martin, R., and Lai, E.C. (2009). Dicing of viral replication intermediates during silencing of latent *Drosophila* viruses. *Proceedings of the National Academy of Sciences of the United States of America* 106, 5270-5275.
- Han, Y.H., Luo, Y.J., Wu, Q.F., Jovel, J., Wang, X.H., Aliyari, R., Han, C.G., Li, W.X., and Ding, S.W. (2011). RNA-Based Immunity Terminates Viral Infection in Adult *Drosophila* in the Absence of Viral Suppression of RNA Interference: Characterization of Viral Small Interfering RNA Populations in Wild-Type and Mutant Flies. *Journal of Virology* 85, 13153-13163.
- He, Y.D., and Zhang, X.B. (2012). Comprehensive characterization of viral miRNAs involved in white spot syndrome virus (WSSV) infection. *Rna Biology* 9, 1019-1029.
- Huang, T.Z., Cui, Y.L., and Zhang, X.B. (2014). Involvement of Viral MicroRNA in the Regulation of Antiviral Apoptosis in Shrimp. *Journal of Virology* 88, 2544-2554.
- Huang, T.Z., and Zhang, X.B. (2013). Host defense against DNA virus infection in shrimp is mediated by the siRNA pathway. *Eur J Immunol* 43, 137-146.
- Jayachandran, B., Hussain, M., and Asgari, S. (2012). RNA Interference as a Cellular Defense Mechanism against the DNA Virus Baculovirus. *Journal of Virology* 86, 13729-13734.
- Leger, P., Lara, E., Jagla, B., Sismeiro, O., Mansuroglu, Z., Coppee, J.Y., Bonnefoy, E., and Bouloy, M. (2013). Dicer-2-and Piwi-Mediated RNA Interference in Rift Valley Fever Virus-Infected Mosquito Cells. *Journal of Virology* 87, 1631-1648.
- Ma, M.J., Huang, Y., Gong, Z.D., Zhuang, L., Li, C., Yang, H., Tong, Y.G., Liu, W., and Cao, W.C. (2011). Discovery of DNA Viruses in Wild-Caught Mosquitoes Using Small RNA High throughput Sequencing. *PLoS One* 6, 7.
- Mueller, S., Gausson, V., Vodovar, N., Deddouche, S., Troxler, L., Perot, J., Pfeffer, S., Hoffmann, J.A., Saleh, M.C., and Imler, J.L. (2010). RNAi-mediated immunity provides strong protection against the negative-strand RNA vesicular stomatitis virus in *Drosophila*. *Proceedings of the National Academy of Sciences of the United States of America*



107, 19390-19395.

Myles, K.M., Wiley, M.R., Morazzani, E.M., and Adelman, Z.N. (2008). Alphavirus-derived small RNAs modulate pathogenesis in disease vector mosquitoes. *Proceedings of the National Academy of Sciences of the United States of America* 105, 19938-19943.

Nandety, R.S., Fofanov, V.Y., Koshinsky, H., Stenge, D.C., and Falk, B.W. (2013). Small RNA populations for two unrelated viruses exhibit different biases in strand polarity and proximity to terminal sequences in the insect host *Homalodisca vitripennis*. *Virology* 442, 12-19.

Sabin, L.R., Zheng, Q., Thekkat, P., Yang, J., Hannon, G.J., Gregory, B.D., Tudor, M., and Cherry, S. (2013). Dicer-2 Processes Diverse Viral RNA Species. *PLoS One* 8, 16.

Schirtzinger, E.E., Andrade, C.C., Devitt, N., Ramaraj, T., Jacobi, J.L., Schilkey, F., and Hanley, K.A. (2015). Repertoire of virus-derived small RNAs produced by mosquito and mammalian cells in response to dengue virus infection. *Virology* 476, 54-60.

Schnettler, E., Tykalova, H., Watson, M., Sharma, M., Sterken, M.G., Obbard, D.J., Lewis, S.H., McFarlane, M., Bell-Sakyi, L., Barry, G., *et al.* (2014). Induction and suppression of tick cell antiviral RNAi responses by tick-borne flaviviruses. *Nucleic Acids Research* 42, 9436-9446.

Scott, J.C., Brackney, D.E., Campbell, C.L., Bondu-Hawkins, V., Hjelle, B., Ebel, G.D., Olson, K.E., and Blair, C.D. (2010). Comparison of Dengue Virus Type 2-Specific Small RNAs from RNA Interference-Competent and -Incompetent Mosquito Cells. *Plos Neglected Tropical Diseases* 4.

Siu, R.W.C., Fragkoudis, R., Simmonds, P., Donald, C.L., Chase-Topping, M.E., Barry, G., Attarzadeh-Yazdi, G., Rodriguez-Andres, J., Nash, A.A., Merits, A., *et al.* (2011). Antiviral RNA Interference Responses Induced by Semliki Forest Virus Infection of Mosquito Cells: Characterization, Origin, and Frequency-Dependent Functions of Virus-Derived Small Interfering RNAs. *Journal of Virology* 85, 2907-2917.

Wu, Q.F., Luo, Y.J., Lu, R., Lau, N., Lai, E.C., Li, W.X., and Ding, S.W. (2010). Virus discovery by deep sequencing and assembly of virus-derived small silencing RNAs. *Proceedings of the National Academy of Sciences of the United States of America* 107, 1606-1611.

Xu, Y., Huang, L.Z., Fu, S., Wu, J.X., and Zhou, X.P. (2012). Population Diversity of Rice Stripe Virus-Derived siRNAs in Three Different Hosts and RNAi-Based Antiviral Immunity in *Laodelphax striatellus*. *PLoS One* 7, 11.

Xu, Y., Huang, L.Z., Wang, Z.C., Fu, S., Che, J., Qian, Y.J., and Zhou, X.P. (2014). Identification of Himetobi P virus in the small brown planthopper by deep sequencing and assembly of virus-derived small interfering RNAs. *Virus Research* 179, 235-240.
